# Supplementary material for: Aerosol Mass yields of selected Biogenic Volatile Organic Compounds – a theoretical study with near explicit gas-phase chemistry
Source: Copernicus journal article supplement (doi:10.5194/acp-2019-424), 2019-05-29
Supplement: Supplementary file [file acp-2019-424-SC1-supplement.pdf]

# Aerosol Mass yields of selected Biogenic Volatile Organic Compounds – a theoretical study with near explicit gas-phase chemistry

Carlton Xavier<sup>1</sup>, Anton Rusanen<sup>1</sup>, Putian Zhou<sup>1</sup>, Chen Dean<sup>1</sup>, Lukas Pichelstofer<sup>1</sup>, Pontus Roldin<sup>2</sup>, Michael Boy<sup>1</sup>

<sup>1</sup>Institute for Atmospheric and Earth Systems Research (INAR), Physics, University of Helsinki

<sup>2</sup>Division of Nuclear Physics, Lund University, Box 118, SE-22100, Lund, Sweden

5

6 **Correspondence** : Carlton Xavier ([carlton.xavier@helsinki.fi](mailto:carlton.xavier@helsinki.fi)), Michael Boy ([michael.boy@helsinki.fi](mailto:michael.boy@helsinki.fi))

7

## 8 **Abstract**

9 In this study we modeled secondary organic aerosols (SOA) mass loadings from the oxidation (by O<sub>3</sub>,  
10 OH and NO<sub>3</sub>) of five representative Biogenic Volatile Organic compounds (BVOCs): isoprene, endocyclic  
11 bond containing monoterpenes ( $\alpha$ -pinene and limonene), exocyclic double bond compound ( $\beta$ -pinene) and a  
12 sesquiterpene ( $\beta$ -caryophyllene). The simulations were designed to replicate idealized smog chamber and  
13 oxidative flow reactors (OFR). The master chemical mechanism (MCM) together with the peroxy radical  
14 autoxidation mechanism (PRAM), were used to simulate the gas-phase chemistry. The aim of this study was  
15 to compare the potency of MCM and MCM+PRAM in predicting SOA formation. SOA yields were in good  
16 agreement with experimental values for chamber simulations when MCM+PRAM was applied, while a  
17 standalone MCM under-predicted the SOA yields. Compared to experimental yields, the OFR simulations  
18 using MCM+PRAM over-predicted SOA mass yields for BVOCs oxidized by O<sub>3</sub> and OH, probably owing to  
19 increased seed particle surface area used in the OFR simulations. SOA yields increased with decreasing  
20 temperatures and NO concentrations and vice-versa. This highlights the limitations posed when using fixed  
21 SOA yields in a majority of global and regional models. Few compounds that play a crucial role (>95% of  
22 mass load) in contributing to SOA mass increase (using MCM+PRAM) are identified. The results further  
23 emphasized that incorporating PRAM in conjunction with MCM does improve SOA mass yields estimation.

24

## 25 1. **Introduction**

26 Atmospheric secondary organic aerosols, formed from gas to particle phase conversion of the  
27 oxidation products of volatile organic compounds (VOC) significantly impact the organic aerosol mass  
28 loadings (Griffin, 1999; Kanakidou et al., 2005). However, the scale of SOA contribution to the aerosol  
29 particle mass is still subjected to high uncertainties (Hao et al., 2011). The elevated aerosol particle

30 concentrations are shown to have inimical effects on health (Miller et al., 2007), and a varying degree of  
31 influence on the climate by forming cloud condensation nuclei (CCN), altering the cloud properties and  
32 radiative balance (Rosenfeld et al., 2014; Schmale et al., 2018). Therefore, it is acutely necessary to  
33 understand the role and contributions of SOA to the particle loading in the atmosphere. Biogenic VOCs from  
34 forest are estimated to contribute to about 90% of VOCs emissions globally (Guenther et al., 1995, 1999 and  
35 2000). The most important BVOCs for SOA formation are isoprene ( $C_5H_8$ ), monoterpenes ( $C_{10}H_{16}$ ) and  
36 sesquiterpenes ( $C_{15}H_{24}$ ). These compounds are all alkenes containing at least one carbon-carbon double bond,  
37 enabling them to undergo oxidation by the dominant atmospheric oxidants: the hydroxyl radical (OH), ozone  
38 ( $O_3$ ) and the nitrate radical ( $NO_3$ ). For some of the terpenes, initial oxidation steps can lead to formation of  
39 highly oxygenated organic molecules (HOM). These HOMs generally have low volatilities and can condense  
40 nearly irreversibly, thereby producing SOA (Ehn et al., 2014). HOMs, detected in both the ambient  
41 atmosphere and chamber experiments (Ehn M, et al., 2012) are formed by autoxidation (Berndt et al., 2016;  
42 Crouse and Nielsen, 2013) wherein peroxy radicals ( $RO_2$ ) undergo subsequent intramolecular H-shifts  
43 accompanied by rapid reactions with  $O_2$ . Autoxidation hence results in compounds containing multiple  
44 functional groups such as hydroxyls, peroxides and carbonyls (Bianchi et al., 2017, Bianchi et al., 2019).

45 A majority of chamber and flow-tube experiments have focused on HOM formation from the  
46 oxidation of various VOCs and their contribution to SOA mass loadings (Ehn et al., 2014; Kristensen et al.,  
47 2017). Oxidation of isoprene (Liu et al., 2016), endocyclic monoterpenes containing reactive double bonds  
48 such as  $\alpha$ -pinene and limonene (Zhao et al., 2015), or exocyclic double bond containing compounds such as  
49  $\beta$ -pinene (Jokinen et al., 2015) and sesquiterpenes such as  $\beta$ -caryophyllene (Chen et al., 2012) have been  
50 investigated. The SOA forming potential of various BVOCs depends on the isomeric structures (Friedman  
51 and Farmer, 2018; Keywood et al., 2004). Ozonolysis of compounds containing reactive endocyclic bonds  
52 such as  $\alpha$ -pinene produce higher SOA mass yields of 41% in comparison to those with exocyclic bonds ( $\beta$ -  
53 pinene), which produce mass yields of 17 % (Lee et al., 2006). One explanation for this dependence on the  
54 isomeric structure is attributed to the formation of HOMs (Ehn et al., 2014). Another important factor  
55 influencing HOM formation is the initial oxidant, as pointed out by Zhao and co-workers (2015). They  
56 showed that the SOA formation by OH oxidation of  $\alpha$ -pinene and limonene were lower when compared to  
57 their SOA formed by ozonolysis. Further they measured lower H/C ratio for SOA produced by monoterpene  
58 ozonolysis (experiments were carried out in dark with CO as OH scavenger), in comparison to OH oxidation  
59 of  $\alpha$ -pinene and limonene. This was attributed to the formation of  $RO_2$  radicals (monoterpenes +  $O_3$ ) which  
60 undergo internal hydrogen shifts and subsequently react with another  $RO_2$  radical, to form compounds  
61 containing carbonyl groups while losing hydrogen atoms in the process. A similar analysis was conducted by

62 Draper et al. (2015), who showed that an increase in NO<sub>2</sub> concentration reduced α-pinene ozonolysis SOA  
63 mass yields, while no appreciable reduction in mass yields are reported for β-pinene and Δ<sup>3</sup>-carene  
64 ozonolysis. On the other hand, the mass yields from limonene ozonolysis increased with increasing NO<sub>2</sub>  
65 concentrations (Draper et al., 2015). This disparity in mass yields for different BVOCs in the presence of NO<sub>2</sub>  
66 is possibly caused by the formation of high MW oligomers (or lack of in case of α-pinene) through oxidation  
67 with NO<sub>3</sub> that contribute to SOA mass loadings (Draper et al., 2015).

68 Due to computational limitations, many regional and canopy scale atmospheric chemistry models  
69 generally use isoprene and/or a representative monoterpene (generally α-pinene), to model SOA yields  
70 (Friedman and Farmer, 2018). The SOA yields of different monoterpenes vary with structure, NO<sub>x</sub> and  
71 temperature (Friedman and Farmer, 2018; Kristensen et al., 2017; Presto et al., 2005). This poses a limitation  
72 on using representative monoterpene fixed SOA yields in many of the global models and increases  
73 uncertainties in predicting cloud condensation nuclei concentrations, cloud droplet number concentrations and  
74 radiative balance due to aerosol loading's.

75 This work aims to investigate the SOA mass loading from the oxidation products of BVOCs with the  
76 atmospheric oxidants OH, O<sub>3</sub> and NO<sub>3</sub> with a specific focus on the BVOCs isoprene, α-pinene, β-pinene,  
77 limonene and β-caryophyllene. Further we study the effect of varying temperature (258.15 K – 313.15 K) and  
78 NO concentrations (0 - 5 ppb) on α-pinene oxidation mass yields. We use the master chemical mechanism  
79 (MCMv3.3.1) (Jenkin et al., 1997, 2012 and 2015; Saunders et al., 2003), a near explicit gas-phase chemical  
80 mechanism together with peroxy radical autoxidation mechanism (PRAM, Roldin et al., 2019) (PRAM +  
81 MCM). The aim is to understand the importance and contribution of peroxy radical autoxidation products to  
82 the SOA mass yields from terpenes.

83

## 84 2. Model description

### 85 2.1 Malte Box

86 MALTE (Model to predict new Aerosol formation in Lower TropospherE) is a one-dimensional  
87 model consisting of modules calculating boundary layer meteorology, emissions of BVOCs, gas-phase  
88 chemistry and aerosol dynamics with the aim to simulate particle distribution and growth in the lower  
89 troposphere (Boy et al., 2006). In this study, a zero-dimensional version, MALTE-Box is applied to simulate  
90 an ideal chamber and flow-tube environment (i.e. no wall losses effects are considered in this study). For the

91 simulations performed in this study the emission module was switched off while only employing the gas-  
92 phase chemistry and aerosol dynamics module.

93 Kinetic preprocessor (KPP) is used to generate a system of coupled differential equations to solve the  
94 gas-phase chemistry schemes (MCM+PRAM, Damian et al., 2002). The peroxy radical autoxidation  
95 mechanism (PRAM), (Roldin et al., 2019, Qi et al., 2018, Öström et al., 2017), formulated based on the  
96 oxidation of monoterpenes as described by Ehn et al. (2014) was incorporated alongside MCMv3.3.1. PRAM  
97 explicitly describes the formation and evolution of peroxy radicals ( $\text{RO}_2$ ) from the ozonolysis and OH  
98 oxidation of monoterpenes, driven by subsequent H-shifts and  $\text{O}_2$  additions. The current version of PRAM  
99 based on experimental and theoretical studies, considers HOM autoxidation for a fraction of the peroxy  
100 radicals formed during the ozonolysis of  $\alpha$ -pinene and limonene and OH oxidation of  $\alpha$ -pinene,  $\beta$ -pinene and  
101 limonene. This is achieved by assigning species specific molar yields for the formation of first  $\text{RO}_2$ , which  
102 subsequently initiates the autoxidation chain (Roldin et al., 2019). Currently, in PRAM a maximum first  
103 generation  $\text{RO}_2$  yield of 9% for  $\alpha$ -pinene ozonolysis, 21.9 % for limonene ozonolysis, 2.5 % for  $\alpha$ -  
104 pinene+OH, and 1% for both limonene+OH and  $\beta$ -pinene+OH first generation products are allowed to initiate  
105 autoxidation (Öström et al., 2017, Qi et al., 2018, Roldin et al., 2019). For  $\beta$ -pinene ozonolysis the molar  
106 yield of  $\text{RO}_2$  is minor (<0.1 %) (Roldin et al., 2019, Ehn et al. 2014) and hence not considered in this work.  
107 The above mentioned  $\text{RO}_2$  molar yields used in this work are close to the experimental values obtained in  
108 both smog chamber and flow tube experiments. Ehn et al. (2014) measured an  $\text{RO}_2$  yield of ~7% for  $\alpha$ -pinene  
109 ozonolysis and ~17% for limonene ozonolysis, whereas Jokinen et al. (2015) measured 0.58 % and 0.93 % for  
110 OH oxidation of  $\beta$ -pinene and limonene respectively. The autoxidation is terminated by bimolecular  
111 reactions, wherein the  $\text{RO}_2$  formed reacts with NO,  $\text{HO}_2$  or other peroxy radicals, thereby forming alkoxy  
112 radicals, closed shell monomers or dimers (Roldin et al., 2019). The PRAM considers temperature dependent  
113 autoxidation reaction rates, which is important when investigating the SOA mass yields at varying  
114 temperatures (Table 1c). It should be noted that the temperature dependence in PRAM is a first of its kind but  
115 needs further evaluation using recent measurements of HOM formation at different temperatures (e.g.  
116 Quéléver et al.2018).

117 The aerosol dynamics are simulated using the University of Helsinki Multicomponent Aerosol model  
118 (UHMA) originally from Korhonen et al. (2004). The model has undergone significant development since  
119 then to allow simulation with all the compounds from MCM. It now supports an unlimited number of  
120 condensing vapors and solves condensation using the analytical predictor of condensation method from  
121 Jacobson (1997). The condensation algorithm considers both, the Kelvin effect and Raoult's law. The  
122 processes included in the model are nucleation, condensation, evaporation, coagulation and deposition. The

123 discretization of the size distribution and the time evolution is modeled with the moving section approach,  
124 with optional redistribution to a fixed grid. In this work, the redistribution is active to make the coagulation  
125 more accurate, since it requires that grid points are available near the size of the coagulated particles. In this  
126 study nucleation and deposition are not active, and hence are not considered. A total of 100 size bins ranging  
127 from 1nm to 20 $\mu$ m with the fixed grid was applied for this study.

128 A group contribution method based on Nannoolal et al. (2008) using the UManSysProp online system  
129 (Topping, 2016) was used to estimate the pure liquid saturation vapor pressures ( $p_0$ ) of the organic  
130 compounds in MCMv3.3.1. For the PRAM species,  $p_0$  were estimated using the functional group method  
131 SIMPOL (Pankow and Asher, 2008; see Roldin et al., 2019 for details)

## 132 2.2 Simulations

133 The simulations performed in this study are aimed to closely resemble an idealized smog chamber  
134 (batch mode setup) and an Oxidative Flow Reactor (OFR) without interactions between the gas phase and the  
135 system walls. For the chamber runs, the VOC and oxidants were introduced at the beginning (time,  $t=0$  sec),  
136 set to certain concentrations and then allowed to react. Both chamber and OFR simulations are performed  
137 using ammonium sulfate seed particles which are introduced at time  $t=0$ . The condensation sink (CS) was  
138 inferred from the size distribution of seed particles used in the model. The CS for the chamber and OFR  
139 simulations was set to  $0.00067\text{ s}^{-1}$  and  $0.067\text{ s}^{-1}$  respectively. SOA mass yields obtained using an OFR are  
140 sensitive to short residence time used, hence the seed particle surface area should be chosen in order to  
141 overcome the mass yield underestimation (Ahlberg et al., 2019). CS sensitivity runs (Supplement Figure S1)  
142 were performed for  $\alpha$ -pinene- $\text{O}_3$  to determine the CS for which there are no appreciable change in mass yields  
143 with increasing particle surface.

144 The simulation for the chamber setup is run for a maximum time of 24 hours and ends when either of  
145 the 2 criteria are satisfied: (1) the simulation time reaches the 24-hour mark or (2) 90 % of the initial  
146 precursor VOC has reacted away. In the latter case the simulation is continued for an additional 2 hours to  
147 ensure enough time for the vapors to condense onto the seed particles. On the contrary, the OFR runs were  
148 simulated for a maximum residence time of 100 seconds, ensuring all initial precursor vapors were oxidized.  
149 Seed particles were also added in the OFR simulations. The oxidant concentrations used for the OFR  
150 simulations are significantly higher in comparison to the simulated chamber runs ( $\sim 2$  orders of magnitude  
151 larger). The time step for the chamber and flow-tube simulations are set to  $t=10\text{ s}$  and  $t=0.1\text{ s}$  respectively.  
152 The runs performed were oxidant specific (i.e. VOCs would be oxidized by only one specific oxidant at any

153 given time). For the O<sub>3</sub> specific simulations no OH could form in both, OFR and chamber setups, thus  
 154 enabling oxidation of O<sub>3</sub> to be the only pathway.

155 The simulations were performed at atmospheric relevant NO<sub>x</sub> (NO<sub>x</sub> = NO +NO<sub>2</sub>) concentrations,  
 156 corresponding to [NO]=0.5 ppb and [NO<sub>2</sub>] = 2.0 ppb conditions with the relative humidity (RH) set to 60 %  
 157 and temperature to 293.15 K. The RH value considered in this study is based on previous published  
 158 experimental studies performed at ~60 % in both smog chamber (Bruns et al., 2015; Ehn et al., 2014;  
 159 Stirnweis et al., 2017) and OFR (Ahlberg et al., 2019).  $\alpha$ -pinene ozonolysis runs were performed at four  
 160 different temperatures: 258.15 K, 278.15 K, 303.15K and 313.15 K, respectively. SOA mass yields are  
 161 expected to increase with decreasing temperature (Saathoff and Naumann, 2009). A similar temperature  
 162 dependence was observed by Kristensen et al. (2017) who observed SOA mass yield from  $\alpha$ -pinene  
 163 ozonolysis at ~ 40 % and ~20 % at 258 K and 293 K respectively. Analogous to analyzing the effect of  
 164 varying temperature on SOA yields, we study the variation in  $\alpha$ -pinene ozonolysis SOA mass yields by  
 165 varying the NO<sub>x</sub> concentrations. SOA yields for  $\alpha$ -pinene ozonolysis at high NO<sub>x</sub> conditions should be  
 166 suppressed (Ng and Chhabra, 2007), which could be due to the production of relatively, volatile organic  
 167 nitrates under high NO<sub>x</sub> conditions as compared to less volatile products during low NO<sub>x</sub> conditions (Presto et  
 168 al., 2005).

169 Furthermore, two different chemistry schemes were applied for the simulations. One scheme consisted  
 170 of only the MCM chemistry mechanism and the second included the MCM+PRAM chemistry mechanism.  
 171 Table 1a shows the concentrations of different BVOCs and Table 1b shows the oxidants concentrations used  
 172 for the simulations.

173 **Table 1a.** Concentrations of different BVOCs

| $\alpha$ -pinene (ppb)                  | $\beta$ -pinene (ppb)                   | Isoprene (ppb)             | Limonene (ppb)                  | $\beta$ -caryophyllene (ppb) |
|-----------------------------------------|-----------------------------------------|----------------------------|---------------------------------|------------------------------|
| 0.5, 1.0, 5.0,<br>50.0, 100.0,<br>200.0 | 0.5, 1.0, 5.0,<br>50.0, 100.0,<br>200.0 | 5.0, 50.0, 100.0,<br>200.0 | 1.0, 5.0, 50.0,<br>100.0, 200.0 | 0.5, 1.0, 2.0, 5.0,<br>10.0  |

174

175 **Table 1b.** Concentrations of different oxidants for chamber and flow-tube runs

|                                                     |                                                                  |                                                                  |
|-----------------------------------------------------|------------------------------------------------------------------|------------------------------------------------------------------|
| OH (* 10 <sup>6</sup> #/cm <sup>3</sup> ) - chamber | O <sub>3</sub> (* 10 <sup>11</sup> #/cm <sup>3</sup> ) - chamber | NO <sub>3</sub> (* 10 <sup>7</sup> #/cm <sup>3</sup> ) - chamber |
| OH (* 10 <sup>8</sup> #/cm <sup>3</sup> ) - OFR     | O <sub>3</sub> (* 10 <sup>13</sup> #/cm <sup>3</sup> ) - OFR     | NO <sub>3</sub> (* 10 <sup>9</sup> #/cm <sup>3</sup> ) - OFR     |

|                            |                            |                            |
|----------------------------|----------------------------|----------------------------|
| 2.0, 5.0 ,10.0, 50.0,100.0 | 1.0, 5.0 ,10.0, 50.0,100.0 | 1.0, 5.0 ,10.0, 50.0,100.0 |
|----------------------------|----------------------------|----------------------------|

176

177 **Table 1c.** NO concentrations and temperatures used for  $\alpha$ -pinene ozonolysis

|                        |                                                     |
|------------------------|-----------------------------------------------------|
| <b>NO (ppb)</b>        | 0.5 (default), 0, 0.2, 1, 2, 5                      |
| <b>Temperature (K)</b> | 293.15 (default), 258.15, 278.15, 303.15,<br>313.15 |

178

179 **2.3 Mass Yields**

180 The SOA mass yields (Y) are determined by calculating the ratio of the amount of SOA or mass  
181 concentration of organic aerosol formed ( $C_{OA}$ ) to the amount of VOC ( $\Delta VOC$ ) reacted:

$$182 \quad Y = \frac{C_{OA}}{\Delta VOC} \quad (1)$$

183 A volatility basis set is fit to the data to obtain the volatility distribution. In this study equilibrium  
184 partitioning was only assumed for deriving the volatility distribution based on the model simulations.  
185 Following Donahue et al. (2006), the SOA is assumed to be in equilibrium with the gas-phase and using the  
186 effective saturation concentration  $C_i^*$  spaced logarithmically. The individual product partitioning to the  
187 particle phase can be estimated using

$$188 \quad E_i = \left( 1 + \frac{C_i^*}{C_{OA}} \right)^{-1} \quad (2)$$

189 Where  $E_i$  is the fraction of species in the condensed particle phase. The above equation determines the  
190 fraction of species in the particle phase as well as in the gas phase. For example, if we assume  $C_{OA} = 10 \mu\text{g m}^{-3}$   
191 a species with  $C^* = 10 \mu\text{g m}^{-3}$  will partition 50 % to condensed phase and the rest 50% will reside in the gas  
192 phase. The fidelity of this equilibrium partitioning enables the parameterization of product vapors in volatility  
193  $C^*$  bins that are near the  $C_{OA}$  concentrations (Henry et al., 2012).

194

195 **3. Results and Discussion**196 **3.1 BVOCs – O<sub>3</sub> chamber and flow-tube simulations**

197 SOA mass yields were simulated for the oxidation of various biogenic volatile organic compounds  
198 (isoprene,  $\alpha$ -pinene, limonene and  $\beta$ -caryophyllene,  $\beta$ -pinene) by dominant atmospheric oxidants OH, O<sub>3</sub> and  
199 NO<sub>3</sub>. The following section examines the comparison between the yields derived using MCM+PRAM and a  
200 standalone MCM for chamber and flow-tube experiments. In Fig 1. the upper panel indicates MCM+PRAM  
201 contribution to SOA mass from BVOCs ozonolysis and the lower panel shows the differences between the  
202 yields obtained from the MCM+PRAM ( $Y_{\text{MCM+PRAM}}$ ) and MCM scheme ( $Y_{\text{MCM+PRAM}} - Y_{\text{MCM}}$ ).

203 The abscissa, depicted on a log scale, considers the entire range of SOA mass loadings from 1-1150  
204  $\mu\text{g}/\text{m}^3$ . Each data point is representative of simulated SOA mass yields resulting from variable BVOC  
205 loading. The resulting mass yields for  $\alpha$ -pinene in the range shown in Table 2a are consistent with the yields  
206 found in various smog chamber experiments. Kristensen et al. (2017) found mass yields of 0.22 and 0.21 for  
207  $\alpha$ -pinene ozonolysis at 293 K with SOA mass loadings of 62 and 59  $\mu\text{g m}^{-3}$ , respectively, while Pathak et al.  
208 (2007) found similar mass yields values in the range of 0.16 – 0.21 for mass loadings between 33.7 – 50.7  $\mu\text{g m}^{-3}$ .  
209  $\text{m}^{-3}$ . These values are within the range of mass yields derived using MCM+PRAM (0.15 - 0.2) while those  
210 derived with only MCM severely under-predict the mass yields. The MCM+PRAM also shows better  
211 agreement with experiments when estimating the lower range mass yields for SOA mass loadings of < 15  $\mu\text{g m}^{-3}$ .  
212 This is supported by the values obtained by Shilling et al. (2008), where the authors measured a 0.09  
213 yield from  $\alpha$ -pinene ozonolysis for SOA mass loading of 10.6  $\mu\text{g m}^{-3}$ . Limonene ozonolysis mass yields using  
214 MCM+PRAM in comparison to standalone MCM, are much closer to the values given by Waring (2016),  
215 wherein he measured high yields of 0.26 - 1.06 for SOA loadings of 1.7 - 718.4  $\mu\text{g m}^{-3}$ .

216 The formation of HOM from  $\beta$ -pinene ozonolysis is low (Ehn et al., 2014; Jokinen et al., 2015) and  
217 hence not considered in PRAM. The peroxy radical autoxidation mechanism for  $\beta$ -caryophyllene ozonolysis  
218 has not yet been developed and hence is not considered in PRAM. Chen et al. (2012) measured SOA particle  
219 mass yield for  $\beta$ -caryophyllene ozonolysis in the range of 0.1- 0.2 for mass loadings  $M_{\text{org}} < 10 \mu\text{g m}^{-3}$  and  
220 ascertained the O<sub>3</sub> concentration insensitivity to the yields. Pathak et al. (2008) measured the  $\beta$ -pinene  
221 ozonolysis mass yields in the range of 0.013- 0.081 for lower reacted concentrations (8-40 ppb) of  $\beta$ -pinene,  
222 while Griffin (1999) measured a yield from 0.01-0.17 for reacted  $\beta$ -pinene in the range of 30 -180 ppb. When  
223 comparing the measured mass yield values for  $\beta$ -caryophyllene and  $\beta$ -pinene ozonolysis to the modeled  
224 values using the MCM scheme, it is evident that the MCM scheme drastically under-predicts the SOA mass  
225 yields.

226 Today oxidation flow reactor (OFR) experiments are complementing the traditional batch mode smog  
227 chamber experiments. The OFR generally exhibits lower mass yields compared to the smog chamber



228 experiments at ranges of equivalent oxidant exposure (Lambe et al., 2015). We modeled flow-tube simulation  
229 after the potential aerosol mass (PAM) OFR, where the residence time is in the order of a few to several  
230 minutes (Lambe et al., 2011). Our model simulations are performed with a maximum residence time of 100  
231 seconds with O<sub>3</sub> exposures ranging from  $1.0 \times 10^{15}$  –  $1.0 \times 10^{17}$  molecules cm<sup>-3</sup> s (residence time x [O<sub>3</sub>]).  
232 Kang and Root (2007) measured a value of 0.2 for ozonolysis of  $\alpha$ -pinene for an initial precursor VOC  
233 concentration of 100 ppbv, while we obtain 0.25-0.3 for the similar initial precursor concentrations. The OFR  
234 yields for  $\beta$ -pinene are significantly lower (0.02) than the values measured by Kang and Root (2007) wherein  
235 they measured a yield of 0.49 for similar initial precursor concentrations. Addition of seed particles promotes  
236 condensation, leading to increased SOA yields (Lambe et al., 2015) which was confirmed by Ahlberg et al,  
237 (2019). Kang and Root (2007) found that using seed particles, the yield from  $\alpha$ -pinene ozonolysis increased  
238 by a factor of  $\sim 1.4$  which can explain our yields for  $\alpha$ -pinene ozonolysis simulations, while the absence of a  
239 PRAM for  $\beta$ -pinene could explain the low values from our simulation. The mass spectra plot (Figure S2)  
240 shows that PRAM contributes the majority of dimers to the particle phase, while MCM dominate monomer  
241 contribution. Another interesting facet of Figure S2 are the different condensing compounds in both OFR and  
242 chamber simulations. The higher absolute RO<sub>2</sub> concentrations in the OFR simulations explain the lower  
243 concentration of HOM monomers and dimers relative to the chamber simulations, i.e. the high RO<sub>2</sub>  
244 concentrations in the OFR cause termination of the peroxy radical autoxidation chain before the RO<sub>2</sub> become  
245 highly oxygenated, thereby influencing SOA yields. Hence, this should be taken into account when using  
246 yields from OFR as inputs to regional and global models.

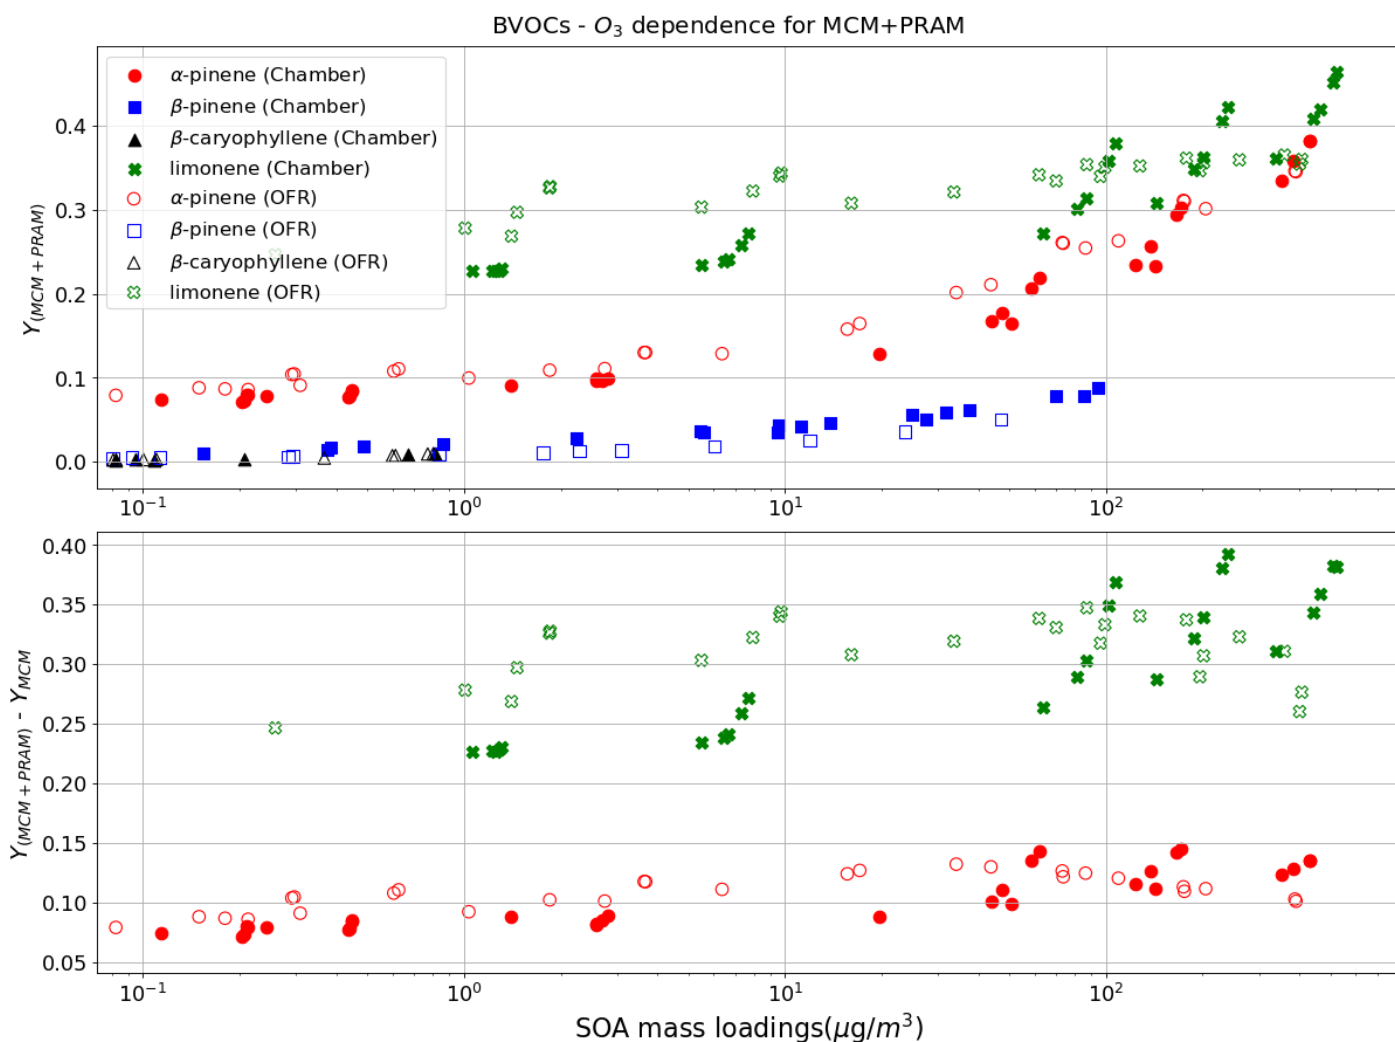

247 **Figure 1.** The mass yields from the ozonolysis of BVOCs modelled after chamber and flow-tube settings. The figure shows a  
 248 comparison of SOA mass yields obtained from simulations with MCM + PRAM and PRAM. The BVOCs are represented by  $\alpha$ -  
 249 pinene (red circles),  $\beta$ -pinene (blue squares), limonene (green stars) and  $\beta$ -caryophyllene (black triangles) with the filled and open  
 250 symbols depicting the chamber and oxidation flow reactor (OFR) simulations respectively.

**Table 2.** Mass yields for BVOCs ozonolysis at 293 K for different range of mass loadings using a chamber<sup>†</sup> and OFR<sup>||</sup> setup.

| SOA mass loading ( $\mu\text{g m}^{-3}$ ) | MCM + PRAM mass yields range | MCM mass yields range | BVOC             | Experimental yields | References             |
|-------------------------------------------|------------------------------|-----------------------|------------------|---------------------|------------------------|
| 0 - 15 <sup>†</sup>                       | 0.07– 0 .08                  | 0.00 – 0.06           | $\alpha$ -pinene | 0.09 (10.6)         | Shilling et al. (2008) |
| 16 - 60 <sup>†</sup>                      | 0.12 – 0.20                  | 0.06 – 0.11           | $\alpha$ -pinene | 0.16 - 0.21         | Pathak et al. (2007)   |

|                       |             |             |                  |           |                          |
|-----------------------|-------------|-------------|------------------|-----------|--------------------------|
| 61 – 200 <sup>†</sup> | 0.22 – 0.30 | 0.12 – 0.15 | $\alpha$ -pinene | 0.22 (62) | Kristensen et al. (2017) |
| 1.1– 550 <sup>†</sup> | 0.24 -0.48  | 0.007-0.06  | limonene         | 0.26-1.06 | Waring (2016)            |
| 0-100 <sup>  </sup>   | 0.07-0.25   | 0-0.13      | $\alpha$ -pinene | 0.2       | Kang and Root (2007)     |

251

### 252 3.2 BVOCs – OH chamber and flow-tube simulations

253 The  $\Delta Y$  in the lower panel of Figure 2 for limonene,  $\beta$ -pinene and  $\alpha$ -pinene resulting from the fact that  
254 PRAM considers peroxy radical autoxidation product formation from OH oxidation of these BVOC's. The  
255 results for SOA mass yields of OH oxidation of  $\alpha$ -pinene using MCM+PRAM is close to the measured values  
256 (Kristensen et al., 2017), while using only MCM under-predicts the mass yields. Similarly, the current lack of  
257 peroxy radical autoxidation product mechanism for  $\beta$ -caryophyllene and isoprene result in  $\Delta Y = 0$  values for  
258 PRAM. The maximum SOA mass yield for OH oxidation of  $\alpha$ -pinene is lower than the yield from ozonolysis  
259 which is suspected to arise due to the formation of more volatile oxidation products produced during OH  
260 oxidation (Bonn and Moortgat, 2002; Kristensen et al., 2014). For  $\beta$ -caryophyllene, Griffin (1999) measured  
261 SOA mass yields in the range of 0.37 – 0.79 for mass loadings of 17 - 82  $\mu\text{g m}^{-3}$  while Tasoglou and Pandis  
262 (2015) measured yields around 0.2 for photo-oxidation at low  $\text{NO}_x$  conditions for loadings of 10  $\mu\text{g m}^{-3}$ .  
263 These values are in good agreement with our results which show a similar yield range of 0.3 – 0.7 for  
264 loadings between 20 - 100  $\mu\text{g m}^{-3}$  and 0.21 for loading of 10  $\mu\text{g m}^{-3}$ . Currently there are no experiments  
265 providing HOM yields from experiments of OH oxidation of  $\beta$ -caryophyllene, and hence, not included in  
266 PRAM. The simulation results for yields from OH oxidation of  $\beta$ -caryophyllene, indicate that the MCM  
267 scheme is able to reproduce the experimental values. The mass yields derived from OH oxidation of isoprene  
268 vary from 0.01 - 0.31 covering a range of mass loadings from 0.003 - 132  $\mu\text{g m}^{-3}$ . At low mass loadings < 10  
269  $\mu\text{g m}^{-3}$  the maximum yield obtained is  $\sim 0.06$ , which is a factor of 2 greater than the experimental results  
270 obtained by Lee et al. (2006) and Kroll et al. (2005), where they measured yields of 0.02 and 0.01 – 0.03  
271 respectively. Liu et al. (2016) measured higher mass yields ( $> 0.1$ ) for similar loadings with a maximum  
272 upper limit yield of 0.15 for 22  $\mu\text{g m}^{-3}$ , while our results under-predict the yields ( $\sim 0.10$ ) for similar  
273 loadings. The OH oxidation of  $\beta$ -pinene and limonene results in a maximum yield of 0.28 for high mass  
274 loading of 319  $\mu\text{g m}^{-3}$  and 0.56 for loadings of 630  $\mu\text{g m}^{-3}$  respectively. These values are similar to the  
275 measurements obtained by Lee et al. (2006) wherein they measured a yield of 0.31 for  $\beta$ -pinene SOA mass  
276 loadings of 293  $\mu\text{g m}^{-3}$  and 0.58 for limonene SOA mass loadings of 394  $\mu\text{g m}^{-3}$ . Yields for limonene SOA  
277 mass loadings of 350  $\mu\text{g m}^{-3}$  are around 0.31 which is lower than the experimental values, measured by Lee et

278 al. (2006). The  $\beta$ -pinene SOA yields are comparatively well represented by MCM+PRAM in comparison to  
 279 the standalone MCM. On the other hand, the limonene mass yields are under-predicted by MCM+PRAM.

280 The OFR simulations results for the OH oxidation of BVOCs with an equivalent exposure range from  
 281  $2.0 \times 10^{10} - 2.0 \times 10^{12}$  molecules  $\text{cm}^{-3}$  s, is shown in Fig. 2. Friedman and Farmer (2018) found mass yields  
 282 of  $7 \times 10^{-4} - 0.086$  for  $\alpha$ -pinene (ammonium sulfate seeded experiment), 0 - 0.12 for  $\beta$ -pinene (no seed  
 283 particles) and 0.0017 - 0.026 for limonene (no seed particles), by varying the OH exposures between  $4.7 \times$   
 284  $10^{10} - 7.4 \times 10^{11}$  molecules  $\text{cm}^{-3}$  s. Our simulated yields for OH oxidation of  $\alpha$ -pinene ( $\sim 0.05 - 0.31$ ),  $\beta$ -  
 285 pinene ( $\sim 0.019 - 0.2$ ) and limonene suggest higher mass yields at both measured lower and higher values of  
 286 values of OH exposures and monoterpene concentrations ( $\sim 12 - 270$  ppb). In contrast to the experiments,  
 287 every simulation contained higher particle surface area, which could explain the higher simulated mass yields  
 288 for the compounds.

**Table 3.** Mass yields for OH oxidation of BVOCs at 293 K for different range of mass loadings using a chamber<sup>†</sup> and OFR<sup>||</sup> setup.

| SOA mass loading ( $\mu\text{g m}^{-3}$ ) | MCM + PRAM mass yields | MCM mass yields | BVOC             | Experimental yields        | References                 |
|-------------------------------------------|------------------------|-----------------|------------------|----------------------------|----------------------------|
| 320 <sup>†</sup>                          | 0.28                   | 0.25            | $\beta$ -pinene  | 0.31                       | Lee et al. (2006)          |
| 350 <sup>†</sup>                          | 0.31                   | 0.06 – 0.11     | limonene         | 0.58                       | Lee et al. (2006)          |
| 0-300 <sup>  </sup>                       | 0.05 – 0.31            | 0. – 0.2        | $\alpha$ -pinene | $7 \times 10^{-4} - 0.086$ | Friedman and Farmer (2018) |
| 0-300 <sup>  </sup>                       | 0.019-0.2              | 0-0.13          | $\beta$ -pinene  | 0 - 0.12                   | Friedman and Farmer (2018) |

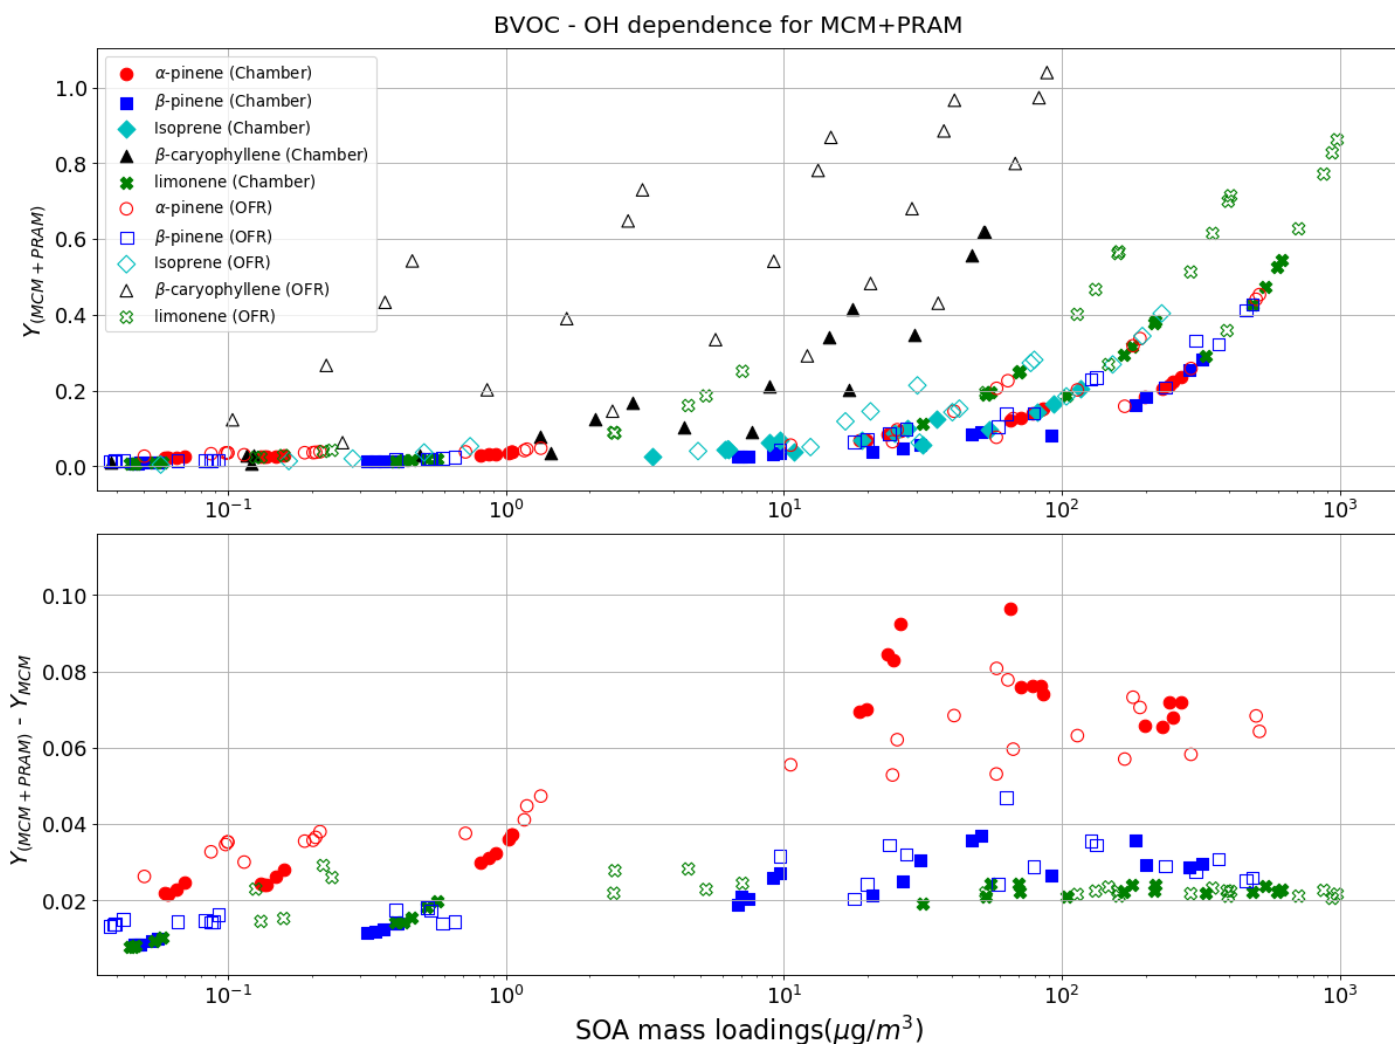

289 **Figure 2.** The mass yields from OH oxidation of BVOCs modeled after chamber and flow-tube settings. The figure shows a  
 290 comparison of SOA mass yields obtained from application of MCM+PRAM and only MCM. The color scheme is the same as in  
 291 figure 1. Additionally, isoprene has been included as it reacts with OH and produces considerable SOA yields.

## 292 BVOC – NO<sub>3</sub> chamber and OFR simulations

293 The yields obtained for oxidation of  $\alpha$ -pinene (0.002-0.007) by NO<sub>3</sub> are low in comparison to those  
 294 obtained by Nah et al. (2016), where they measured a yield of 0.036. Measured mass yields for limonene  
 295 oxidation by NO<sub>3</sub> resulting in mass yields between 0.25-0.4 (Fry et al., 2011), whereas we obtain negligible  
 296 (~0.0003) mass yields for the same. Due to limited experimental constraints, PRAM presently does not  
 297 consider autoxidation of RO<sub>2</sub> formed from NO<sub>3</sub> oxidation of VOCs, which could explain the huge discrepancy  
 298 between the measured and simulated mass yields.

299

BVOC -  $\text{NO}_3$  dependence for MCM+PRAM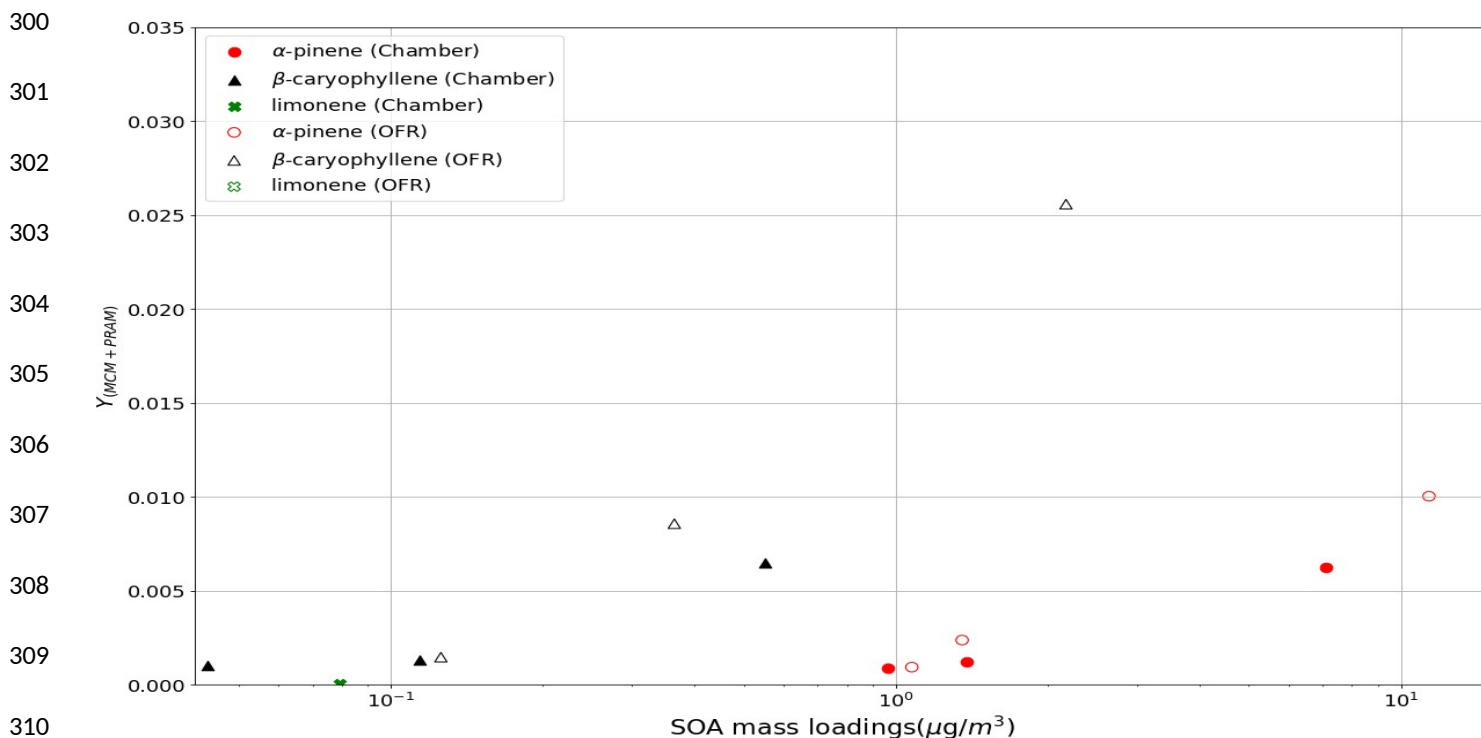

310

311 **Figure 3.** The mass yields from  $\text{NO}_3$  oxidation of BVOCs modeled after chamber and flow-tube settings. The figure shows a  
 312 comparison of SOA mass yields obtained from application of MCM+PRAM. Appreciable mass yields were only obtained for  $\alpha$ -  
 313 pinene, limonene and  $\beta$ -caryophyllene.

### 314 3.3 $\text{NO}_x$ dependence

315 Organic oxidation mechanisms are sensitive to  $\text{NO}_x$  concentrations as they change the fate to  $\text{RO}_2$   
 316 radical formed, thereby impacting the distribution of reaction products and aerosol formation (Presto et al.,  
 317 2005; Zhao et al., 2018). We modeled the SOA mass yields for  $\alpha$ -pinene -  $\text{O}_3$  setup with varying  $\text{NO}_x$   
 318 concentrations (NO was varied whereas  $\text{NO}_2$  was kept constant for all the runs), for initial  $\alpha$ -pinene mixing  
 319 ratios in the range 0.5 - 200 ppb (Fig. 4). A maximum SOA yield value of 0.55 is obtained for a combination  
 320 of the lowest value of NO (0 ppb, red circles). As the NO concentrations increase from 0.2 ppb (blue squares)  
 321 to 5 ppb (green inverted triangles) the yields begin to decrease, and this pattern is observable and valid for all  
 322 concentration ranges of reacted precursor VOC. The  $\text{NO}_x$  dependence of  $\alpha$ -pinene ozonolysis is consistent  
 323 with the findings of Draper et al. (2015) and Presto et al. (2005) wherein they observed a trend of decreasing  
 324 SOA mass yields for  $\alpha$ -pinene ozonolysis with increasing  $\text{NO}_x$  concentrations.  $\text{NO}_x$  concentrations alter the  
 325  $\text{HO}_2/\text{RO}_2$  ratio thereby impacting competing peroxy radical ( $\text{RO}_2$ ) reaction pathways (Presto et al., 2005;  
 326 Sarrafzadeh et al., 2016).

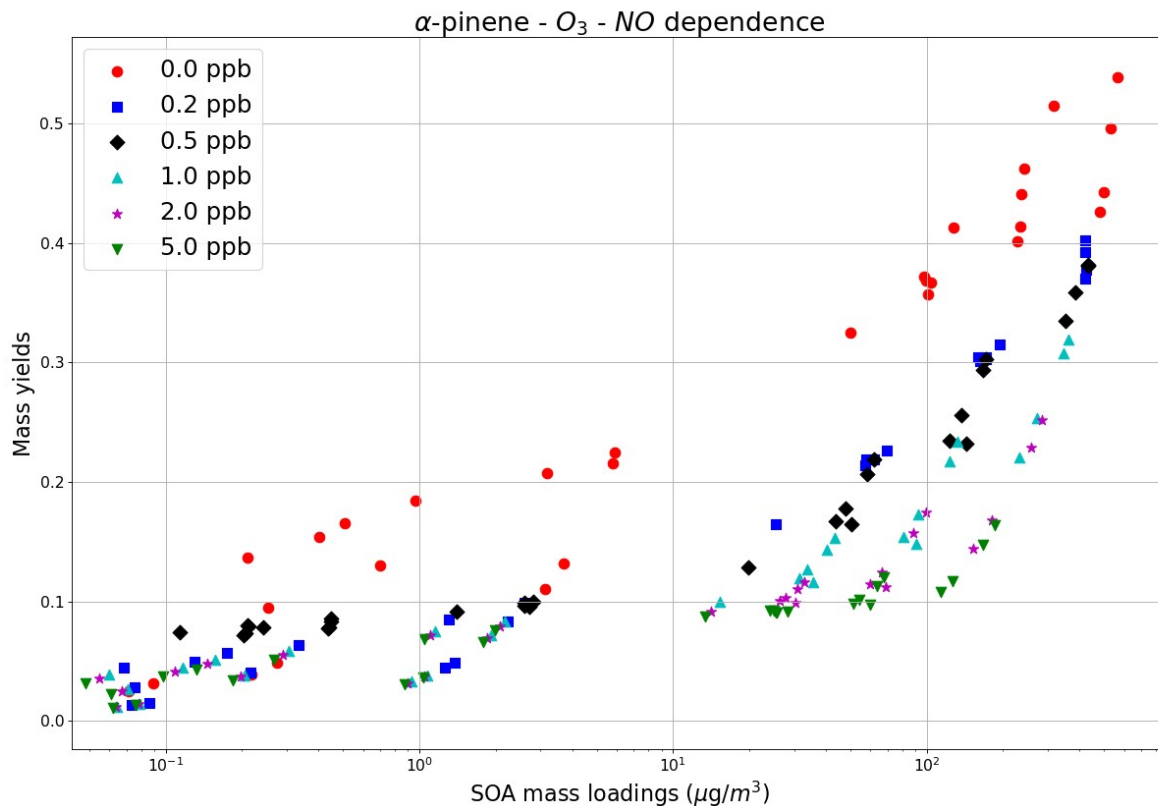

327 **Figure 4.** The SOA mass yields from O<sub>3</sub> oxidation of α-pinene modeled for different NO concentrations with the chamber setup.  
 328 The model runs were performed using MCM+PRAM.

329 At low NO<sub>x</sub> concentrations RO<sub>2</sub> radicals undergo rapid autoxidation until they react with HO<sub>2</sub> or RO<sub>2</sub>  
 330 resulting in production of low volatility hydro-peroxide products (Sarrafzadeh et al., 2016), closed shell  
 331 monomers or dimers (Ehn et al., 201; Roldin et al., 2019), which increase SOA mass. This contrasts with high  
 332 NO<sub>x</sub> conditions where the RO<sub>2</sub>+NO reactions dominate over reactions with HO<sub>2</sub> or RO<sub>2</sub>, resulting in the  
 333 formation of more volatile products such as aldehydes, ketones and organonitrates (Presto et al., 2005;  
 334 Sarrafzadeh et al., 2016), and likely suppressing the autoxidation process leading to a decrease in SOA mass  
 335 loadings (Ehn et al., 2014).

336 Figure 5 shows the absolute contributions to SOA mass loadings by PRAM and MCM compounds at  
 337 two different O<sub>3</sub> concentrations of 4 and 100 ppb and varying NO concentrations. The figure shows that with  
 338 an increase in NO concentrations the contribution of PRAM compounds to the particle phase decreases at  
 339 both 4 and 100 ppb of O<sub>3</sub> concentrations. In PRAM the RO<sub>2</sub> + NO reaction leads either to the formation of  
 340 organonitrate HOM, closed shell monomers with carbonyl group or fragmentation products with higher  
 341 volatility (Roldin et al., 2019). HOM Dimer formation is suppressed with increasing NO concentrations in

342 PRAM (Roldin et al., 2019) which explains the lower contribution by PRAM compounds to SOA mass  
 343 loadings with increasing NO. The PRAM contribution increases at low NO (<1 ppb) and then decreases  
 344 thereafter. At low NO concentrations (<1ppb), first generation RO<sub>2</sub> are capable of undergoing autoxidation  
 345 forming highly oxygenated RO<sub>2</sub> which subsequently reacts with NO forming organic nitrates (Ehn et al.,  
 346 2014). As NO concentrations exceed 1ppb the first generation RO<sub>2</sub> is scavenged by NO thereby reducing the  
 347 concentration of organonitrate HOM (Ehn et al., 2014), possibly affecting SOA yields. The MCM  
 348 contribution also decreases with increasing NO concentrations mostly due to the formation more volatile  
 349 organonitrates (Jenkin et al., 2019) .

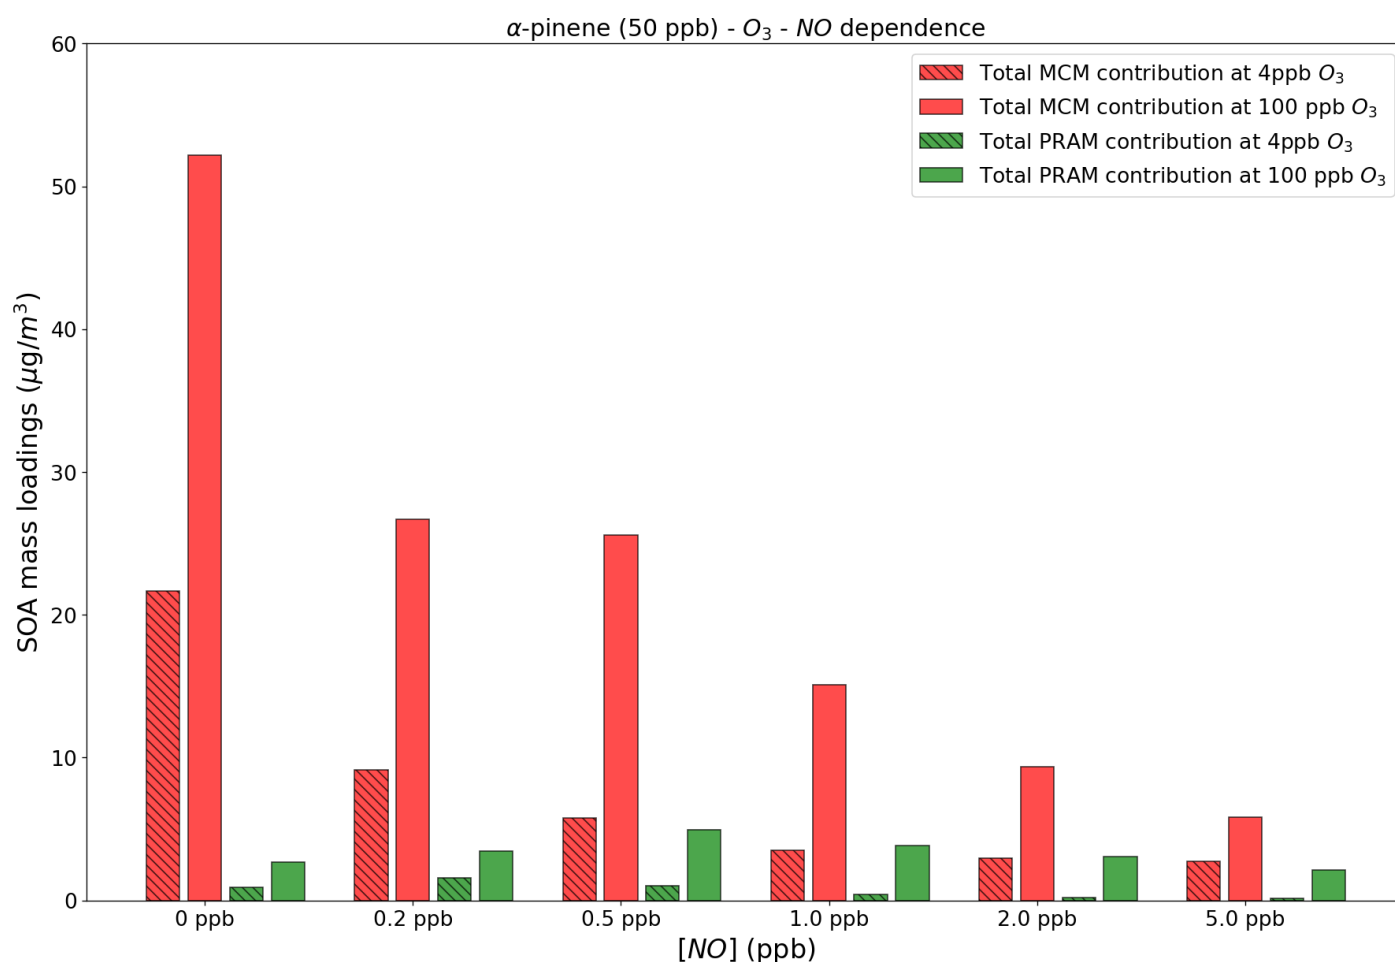

350 **Figure 5.** Contribution to the SOA mass loadings by total PRAM and MCM compounds at different NO<sub>x</sub> levels and O<sub>3</sub>  
 351 concentrations. For comparison we use 4 ppb and 100 ppb O<sub>3</sub> concentrations, respectively, at 50 ppb  $\alpha$ -pinene.

### 352 3.4 Temperature dependence

353 The formation of SOA from  $\alpha$ -pinene ozonolysis in the temperature range of 258.15 - 313.15 K was  
 354 investigated in this study using MCM+PRAM. Strong dependence of SOA mass yield on temperature was  
 355 reported by Saathoff and Naumann, (2009) wherein they measured the decreasing mass yields from 0.42 at



356 273.15 K to 0.09 to 313.15 K for SOA loadings of 53 and 92  $\mu\text{g m}^{-3}$  respectively. Our results in Figure 6  
 357 show increasing SOA mass yields for  $\alpha$ -pinene ozonolysis with decreasing temperature, which is attributed to  
 358 the augmented condensation of oxidation products termed as semi volatile organic compounds (SVOC)  
 359 (Kristensen et al., 2017) at lower temperatures.

360 For  $\alpha$ -pinene maximum mass loading  $< 150 \mu\text{g m}^{-3}$  the mass yields reach a maximum value of 0.38 at  
 361 temperatures as low as 258.15 K and decreases to 0.27 for a temperature of 293.15 K to 0.1 for the  
 362 temperature of 313.15 K. These yields are comparable to the results obtained by Kristensen et al.  
 363 (2017) where they measured yields of 0.39 for 258.15 K and 0.22 for 293.15 K for mass loading  $< 150 \mu\text{g m}^{-3}$ .  
 364 The results show a weak dependence of SOA mass yields on temperatures in the range of 278.15 K - 313.15  
 365 K at low SOA mass loadings but become more pronounced as the mass loadings increase. At the lowest  
 366 temperature of 258.15 K the mass yields are higher in comparison to other temperatures regardless the mass  
 367 loadings. These results are in good agreement with the findings by Pathak et al. (2007) where they found a  
 368 strong temperature dependence of SOA mass yields at lower temperature ( $0 - 15^\circ \text{C}$ ), which decreases as the  
 369 temperature increases. Furthermore, similar to the measurements made by Pathak et al. (2007), our  
 370 simulations were able to reproduce the experimental findings that show no appreciable differences in the SOA  
 371 mass yields for loadings below  $1 \mu\text{g m}^{-3}$  (initial mixing ratio of 1 ppb) for temperatures  $> 273.15 \text{ K}$ .

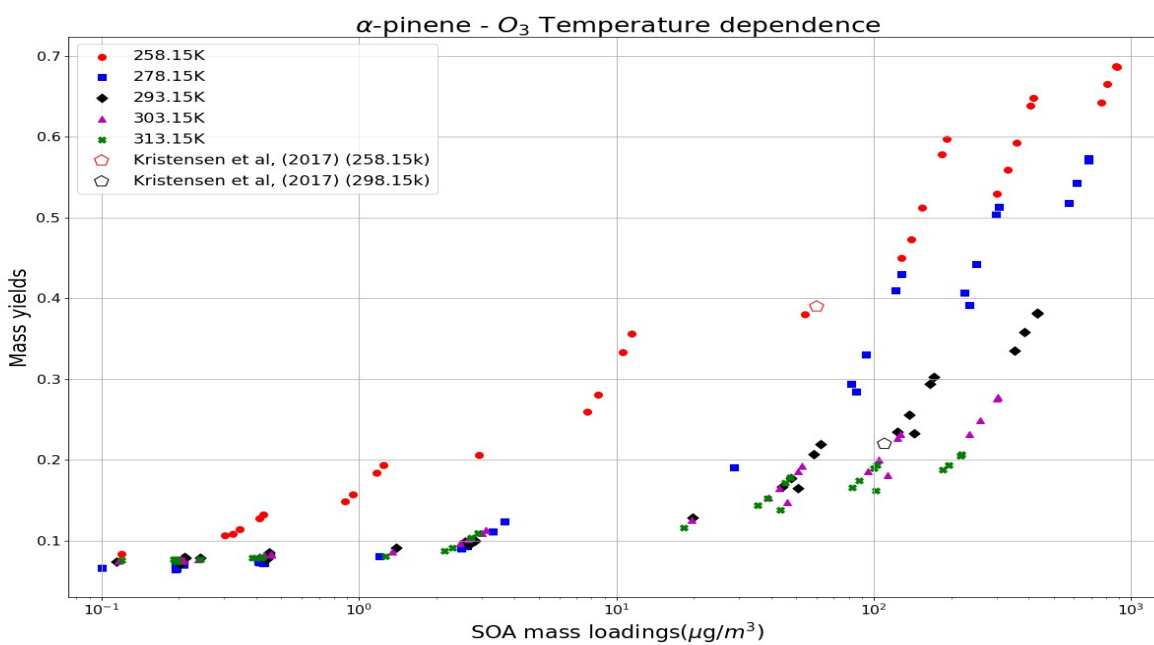

372 **Figure 6.** Temperature dependence of SOA mass yields at different temperatures using the MCM+PRAM. The open pentagons  
 373 represent measurement data from Kristensen et al. (2017) at 258.15 K and 298.15 K.

374 Figure 7 shows the volatility distribution of  $\alpha$ -pinene ozonolysis derived SOA at different  
 375 temperatures. The saturation vapor pressure limits for defining extremely low volatility (ELVOCs - grey  
 376 shaded), low volatility (LVOCs - red shaded), semi volatile (SVOCs - green shaded) and intermediate  
 377 volatility (IVOCs - cyan shaded) organic compounds used in the Volatility basis set (VBS) are set according  
 378 to the values suggested in Donahue et al. (2012). In this work, we categorize compounds (ELVOCs, LVOCs,  
 379 SVOCs and IVOCs) based on effective saturation vapor pressures ( $C^*$ ) in the range of  $\{10^{-5}$  to  $10^3\}$   $\mu\text{g m}^{-3}$   
 380 and temperature of 298 K (Donahue et al., 2009). At the lowest temperature of 258.15 K, the SVOCs  
 381 contribution to the particle phase is dominant in comparison to LVOCs and ELVOCs, a trend which is  
 382 subsequently reversed as the temperatures are increased. At 293.15 K a majority of SVOCs and IVOCs are in  
 383 the gas phase while the contribution of LVOCs and ELVOCs to particle phases increases. These results are in  
 384 good agreement with observations made by Kristensen et al. (2017) wherein they observed an increasing  
 385 contribution of SVOCs at sub-zero temperatures of 258.15 K, which decrease the fraction of SOA formed  
 386 from ELVOCs. Again, it should be noted that the temperature dependence of peroxy radical autoxidation  
 387 product formation still needs further validation based on recent experiments (e.g. Quéléver et al., 2018).  
 388

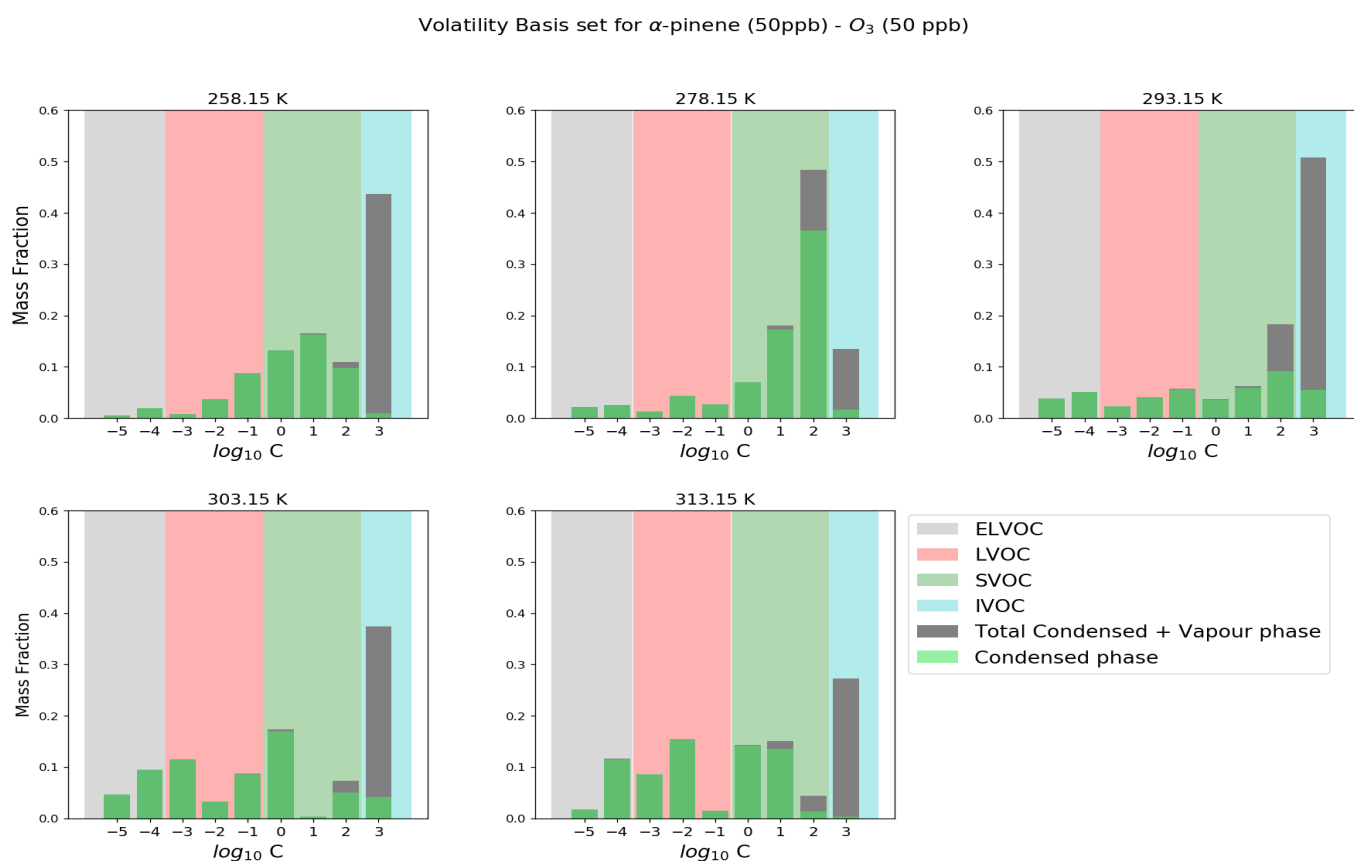

389 **Figure 7.** Modeled volatility distribution of SOA at different temperatures. The volatility bins span a range of effective saturation  
 390 vapor pressures  $C = C^* = \{10^{-5}$  to  $10^3\}$   $\mu\text{g m}^{-3}$ . The VBS distribution is based on a reference temperature of 298 K.

391 **3.5 Composition**

392 MCM+PRAM can be used to narrow down and compile a list of compounds playing a pivotal role in  
 393 contributing to SOA mass loadings and, also compare the relative importance of implementing PRAM  
 394 alongside the MCM. Figure 8 shows the most important compounds from both the MCM and PRAM that  
 395 condense on the seed particles and have a dominant contribution (>95%) to the  $\alpha$ -pinene ozonolysis SOA  
 396 mass loading at 293 K.

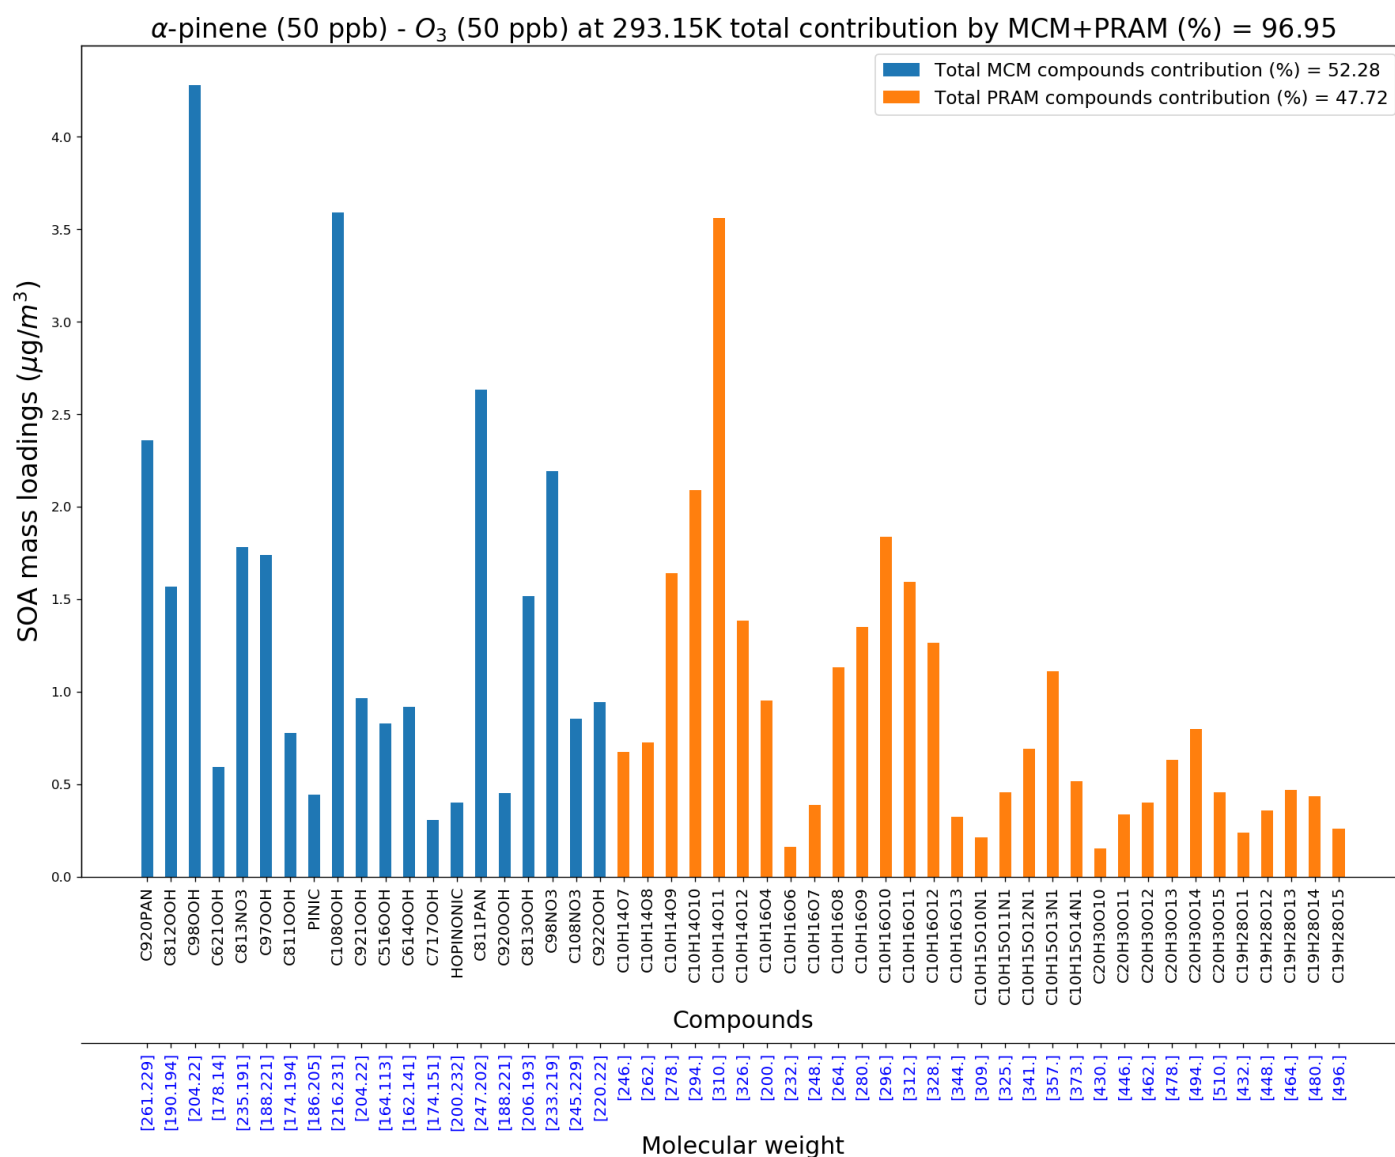

397 **Figure 8.** MCM and PRAM Compounds contributing to > 95 % of SOA mass at 293 K and 50ppb  $O_3$  and  $\alpha$ -pinene concentrations.

398 At 293 K (Figure 8) the listed compounds (MCM+PRAM) contribute ~97 % to the SOA mass loading with  
 399 PRAM compounds contributing to ~48 % (of 97 %) in comparison to MCM compounds which contribute ~52  
 400 % (of 97%). On lowering the temperature to 258K the relative contributions of PRAM drop to 15 % (of ~98

401 %), while MCM dominates by contributing ~85 % (of ~98 %) respectively (Figure S3a). The contribution of  
402 PRAM increases to ~64 % (of ~97 %) and MCM contribution drops to 36 % (of ~97 %) at 313 K (Figure  
403 S3b). These results reflect the importance of PRAM as its contribution plays an increasingly dominant role  
404 with increasing temperatures and highlights the crucial few compounds that contribute to maximum SOA  
405 mass loadings for  $\alpha$ -pinene ozonolysis. The list of abundant compounds which together add up to contribute  
406 more than 95 % of SOA mass loadings at 258 K, 293 K and 313 K are presented in the supplement Table 1s  
407 (a, b & c). At 258 K MCM compounds namely pinonic acid ( $C_{10}H_{16}O_3$ , 4.4 %), C920PAN ( $C_{10}H_{15}NO_7$ , 9.3  
408 %), C108NO3 ( $C_{10}H_{15}NO_6$ , 8.9 %), C811PAN ( $C_9H_{13}NO_7$ , 10.1 %), C717NO3 ( $C_7H_9NO_6$ , 11.3 %) contribute  
409 significantly to the total SOA mass loadings while PRAM compounds such as  $C_{10}H_{14}O_7$  (0.88 %),  $C_{10}H_{16}O_4$   
410 (1.3 %),  $C_{10}H_{16}O_6$  (1.13 %) contribute significantly less. An increase in temperature to 293 K results in an  
411 overall increase in contribution by PRAM compounds, with  $C_{10}H_{14}O_{10}$  (3.6 %),  $C_{10}H_{14}O_{11}$  (6.2 %),  $C_{10}H_{16}O_{10}$   
412 (3.2 %) playing an important role in contributing to the SOA mass loadings. This trend of relative increase in  
413 the contribution by PRAM compounds over MCM compounds to SOA mass loadings is also evident as the  
414 temperatures are further increased to 313 K, where the PRAM compounds  $C_{10}H_{14}O_{11}$  (18.3 %),  $C_{10}H_{14}O_{12}$  (6  
415 %) and  $C_{10}H_{16}O_{12}$  (6.6 %) play a dominant role in increasing SOA mass loadings.

## 416 **Conclusions**

417 We simulated SOA mass yields derived from the oxidation of various BVOCs (isoprene,  $\alpha$ -pinene,  $\beta$ -  
418 pinene, limonene and  $\beta$ -caryophyllene), by the oxidants  $O_3$ , OH and  $NO_3$  using the zero-dimensional model  
419 MALTE-Box. The gas phase chemistry was simulated using the MCM in conjunction with PRAM. The aim  
420 was to verify the efficacy of MCM+PRAM in simulating the SOA mass yields. Additional simulations were  
421 performed to test the MCM+PRAM under varying temperature and NO concentrations. A few important  
422 compounds playing a major role in increasing the SOA mass yields for  $\alpha$ -pinene ozonolysis at different  
423 temperatures are also highlighted.

424 The simulations were designed to resemble ideal smog chambers experiments and experiments in  
425 oxidative flow reactors (OFR). No interactions between the gas phase and chamber walls were considered  
426 during the simulations. For the smog chamber setting, the standalone MCM generally under-predicts the mass  
427 yields obtained by the ozonolysis and OH oxidation of BVOCs. In contrast, the yields derived using  
428 MCM+PRAM for the smog chamber setup is in good agreement with the experimental results. For an  
429 idealized OFR setup, MCM+PRAM over-predicts the yields in case of ozonolysis and OH oxidation of  
430 BVOCs, while again the MCM under-predicts the SOA yields. This over prediction in mass yields for the  
431 OFR simulation was a result of higher CS used in the OFR. The relative contribution of HOM monomers and

432 dimers to the particle phase in OFR simulations is low when compared to the chamber simulations. This is  
433 due to higher RO<sub>2</sub> concentrations in OFR leading to termination of peroxy radical autoxidation, thereby  
434 affecting SOA yields. This needs to be considered when applying yields based on OFR simulations in  
435 regional or global chemical transport models

436 The BVOCs included in this study do not produce appreciable SOA mass yields when oxidized with  
437 NO<sub>3</sub>, as PRAM currently does not consider autoxidation of RO<sub>2</sub> formed from NO<sub>3</sub> oxidation of VOCs. This  
438 underlines the need for developing a NO<sub>3</sub> oxidation scheme which can better constrain and predict SOA mass  
439 yields. In accordance to the previous studies, the simulated SOA yields tend to decrease at higher  
440 temperatures. The PRAM contribution to mass yields at low temperatures (258.15 K) is ~14 %, which is  
441 substantially lower in comparison to MCM (~86 %). As the temperature is increased to 313.15 K, the  
442 contribution of PRAM to SOA mass yields begins to dominate over MCM. This most likely is due to MCM  
443 containing more SVOCs (compounds classified as SVOCs at 298 K), which show stronger contribution to  
444 particle phase at lower temperatures, due to decrease in saturation vapor pressures with temperature. It should  
445 be noted that the present temperature dependency of mass yields using PRAM are a first, and currently the  
446 best estimate in understanding the influence of temperature on the peroxy radical autoxidation formation. The  
447 simulated SOA yields with varying NO concentrations agree well with experimental results, i.e. SOA yields  
448 decrease with increasing NO concentrations due to the formation of more volatile compounds such as  
449 organonitrates and ketones.

450 Using PRAM in addition to MCM has paved way to bridge the gap in understanding the role and  
451 contribution of peroxy radical autoxidation to SOA formation. The variation of SOA yields for temperature  
452 and NO concentrations, indicates the limitations of global and regional models in predicting e.g. cloud  
453 condensation nuclei (CCN) effects using fixed SOA yields. The good agreement of modeled and experimental  
454 yields from smog chambers, respectively, could further help us parameterize the SOA yields, that could be  
455 applied at a global and regional model scale, to more accurately predict the direct and indirect impact of  
456 aerosol particles on e.g. radiation balance by aerosol scattering/absorption and CCN concentrations.

#### 457 **Author Contributions**

458 CX and MB served as the chief authors and editors of the paper. CX was performing the model simulations.  
459 The study was designed by CX, MB and PR. All other co-authors contributed to the analysis and writing of  
460 the paper.

462 **Acknowledgements**

463 The presented research has been funded by the Academy of Finland (Center of Excellence in Atmospheric  
464 Sciences) grant no. 4100104 and the Swedish Research Council FORMAS, project no. 2018-01745.

465 **References**

- 466 Ahlberg, E., Eriksson, A., Brune, W. H., Roldin, P. and Svenningsson, B.: Effect of salt seed particle surface  
467 area, composition and phase on secondary organic aerosol mass yields in oxidation flow reactors, *Atmos.*  
468 *Chem. Phys.*, 19(4), 2701–2712, doi:10.5194/acp-19-2701-2019, 2019.
- 469 Berndt, T., Richters, S., Jokinen, T., Hyttinen, N., Kurtén, T., Otkjær, R. V., Kjaergaard, H. G., Stratmann, F.,  
470 Herrmann, H., Sipilä, M., Kulmala, M. and Ehn, M.: Hydroxyl radical-induced formation of highly oxidized  
471 organic compounds, *Nat. Commun.*, 7(May), doi:10.1038/ncomms13677, 2016.
- 472 Bianchi, F., Garmash, O., He, X., Yan, C., Iyer, S., Rosendahl, I., Xu, Z., Rissanen, M. P., Riva, M., Taipale,  
473 R., Sarnela, N., Petäjä, T., Worsnop, D. R., Kulmala, M., Ehn, M. and Junninen, H.: The role of highly  
474 oxygenated molecules (HOMs) in determining the composition of ambient ions in the boreal forest, *Atmos.*  
475 *Chem. Phys.*, 17(22), 13819–13831, doi:10.5194/acp-17-13819-2017, 2017.
- 476 Bianchi, F., Kurtén, T., Riva, M., Mohr, C., Rissanen, M. P., Roldin, P., Berndt, T., Crouse, J. D.,  
477 Wennberg, P. O., Mentel, T. F., Wildt, J., Junninen, H., Jokinen, T., Kulmala, M., Worsnop, D. R., Thornton,  
478 J. A., Donahue, N., Kjaergaard, H. G. and Ehn, M.: Highly Oxygenated Organic Molecules (HOM) from Gas-  
479 Phase Autoxidation Involving Peroxy Radicals: A Key Contributor to Atmospheric Aerosol, *Chem. Rev.*,  
480 doi:10.1021/acs.chemrev.8b00395, 2019.
- 481 Bonn, B. and Moortgat, G. K.: New particle formation during  $\alpha$ - and  $\beta$ -pinene oxidation by O<sub>3</sub>, OH and NO<sub>3</sub>,  
482 and the influence of water vapour: Particle size distribution studies, *Atmos. Chem. Phys.*, 2(3), 183–196,  
483 doi:10.5194/acp-2-183-2002, 2002.
- 484 Boy, M., Hellmuth, O., Korhonen, H., Nilsson, E. D., Revelle, D., Turnipseed, A., Arnold, F. and Kulmala,  
485 M.: MALTE - Model to predict new aerosol formation in the lower troposphere, *Atmos. Chem. Phys.*, 6(12),  
486 4499–4517, doi:10.5194/acp-6-4499-2006, 2006.
- 487 Bruns, E. A., El Haddad, I., Keller, A., Klein, F., Kumar, N. K., Pieber, S. M., Corbin, J. C., Slowik, J. G.,  
488 Brune, W. H., Baltensperger, U. and Prévôt, A. S. H.: Inter-comparison of laboratory smog chamber and flow  
489 reactor systems on organic aerosol yield and composition, *Atmos. Meas. Tech.*, 8(6), 2315–2332,  
490 doi:10.5194/amt-8-2315-2015, 2015.
- 491
- 492 Chen, Q., Li, Y. L., McKinney, K. A., Kuwata, M. and Martin, S. T.: Particle mass yield from  $\beta$ -  
493 caryophyllene ozonolysis, *Atmos. Chem. Phys.*, 12(7), 3165–3179, doi:10.5194/acp-12-3165-2012, 2012.
- 494 Crouse, J. D. and Nielsen, L. B.: Autoxidation of Organic Compounds in the Atmosphere, *J. Phys. Chem.*  
495 *Lett.*, 24(4), 3513–3520, doi:10.1021/jz4019207, 2013.
- 496 Damian, V., Sandu, A., Damian, M., Potra, F. and Carmichael, G. R.: The kinetic preprocessor KPP - A  
497 software environment for solving chemical kinetics, *Comput. Chem. Eng.*, 26(11), 1567–1579,  
498 doi:10.1016/S0098-1354(02)00128-X, 2002.
- 499 Donahue, N. M., Robinson, A. L., Stanier, C. O. and Pandis, S. N.: Coupled Partitioning, Dilution, and  
500 Chemical Aging of Semivolatile Organics, *Environ. Sci. Technol.*, 40(8), 2635–2643, doi:10.1021/es052297c,  
501 2006.

- 502 Donahue, N. M., Robinson, A. L. and Pandis, S. N.: Atmospheric organic particulate matter: From smoke to  
503 secondary organic aerosol, *Atmos. Environ.*, 43(1), 94–106,  
504 doi:<https://doi.org/10.1016/j.atmosenv.2008.09.055>, 2009.
- 505 Donahue, N. M., Kroll, J. H., Pandis, S. N. and Robinson, A. L.: A two-dimensional volatility basis set-Part 2:  
506 Diagnostics of organic-aerosol evolution, *Atmos. Chem. Phys.*, 12(2), 615–634, doi:10.5194/acp-12-615-  
507 2012, 2012.
- 508 Draper, D. C., Farmer, D. K., Desyaterik, Y. and Fry, J. L.: A qualitative comparison of secondary organic  
509 aerosol yields and composition from ozonolysis of monoterpenes at varying concentrations of NO<sub>2</sub>, *Atmos.*  
510 *Chem. Phys.*, 15(21), 12267–12281, doi:10.5194/acp-15-12267-2015, 2015.
- 511 Ehn, M., Thornton, J. A., Kleist, E., Sipilä, M., Junninen, H., Pullinen, I., Springer, M., Rubach, F., Tillmann,  
512 R., Lee, B., Lopez-Hilfiker, F., Andres, S., Acir, I. H., Rissanen, M., Jokinen, T., Schobesberger, S.,  
513 Kangasluoma, J., Kontkanen, J., Nieminen, T., Kurtén, T., Nielsen, L. B., Jørgensen, S., Kjaergaard, H. G.,  
514 Canagaratna, M., Maso, M. D., Berndt, T., Petäjä, T., Wahner, A., Kerminen, V. M., Kulmala, M., Worsnop,  
515 D. R., Wildt, J. and Mentel, T. F.: A large source of low-volatility secondary organic aerosol, *Nature*,  
516 506(7489), 476–479, doi:10.1038/nature13032, 2014.
- 517 Friedman, B. and Farmer, D. K.: SOA and gas phase organic acid yields from the sequential photooxidation  
518 of seven monoterpenes, *Atmos. Environ.*, 187(January), 335–345, doi:10.1016/j.atmosenv.2018.06.003, 2018.
- 519 Fry, J. L., Kiendler-Scharr, A., Rollins, A. W., Brauers, T., Brown, S. S., Dorn, H. P., Dubé, W. P., Fuchs, H.,  
520 Mensah, A., Rohrer, F., Tillmann, R., Wahner, A., Wooldridge, P. J. and Cohen, R. C.: SOA from limonene:  
521 Role of NO<sub>3</sub> in its generation and degradation, *Atmos. Chem. Phys.*, 11(8), 3879–3894, doi:10.5194/acp-11-  
522 3879-2011, 2011.
- 523 Griffin, R. J.: Organic aerosol formation from the oxidation of biogenic hydrocarbons, , 104(D3), 3555–3567,  
524 1999.
- 525 Guenther, A., Baugh, B., Brasseur, G., Greenberg, J., Harley, P., Klinger, L., Serca, D., and Vierling, L.:  
526 Isoprene emission estimates and uncertainties for the Central African EXPRESSO study domain, *J. Geophys.*  
527 *Res. Atmos.*, 104(D23), 30625–30639, doi:10.1029/1999JD900391, 1999.
- 528 Guenther, A., Nicholas Hewitt, C., David, E., Fall, R., Chris, G., Tom, G., Peter, H., Klinger, L., Manuel, L.,  
529 Mckay, W. A., Tom, P., Scholes, B., Steinbrecher, R., Tallamraju, R., Taylor, J. and Zimmerman, P.: A  
530 global model of natural volatile organic compound emissions s Raja the balance Triangle changes in the  
531 atmospheric accumulation rates of greenhouse Triangle Several inventories of natural and Exposure  
532 Assessment global scales have been two classes Fores, *J. Geophys. Res.*, 100(94), 8873–8892,  
533 doi:doi:10.1029/94JD02950, 1995.
- 534 Guenther, A., Geron, C., Pierce, T., Lamb, B., Harley, P. and Fall, R.: Natural emissions of non-methane  
535 volatile organic compounds, carbon monoxide, and oxides of nitrogen from North America, *Atmos. Environ.*,  
536 34(12–14), 2205–2230, doi:10.1016/S1352-2310(99)00465-3, 2000.
- 537 Hao, L. Q., Romakkaniemi, S., Yli-Pirilä, P., Joutsensaari, J., Kortelainen, A., Kroll, J. H., Miettinen, P.,  
538 Vaattovaara, P., Tiitta, P., Jaatinen, A., Kajos, M. K., Holopainen, J. K., Heijari, J., Rinne, J., Kulmala, M.,  
539 Worsnop, D. R., Smith, J. N. and Laaksonen, A.: Mass yields of secondary organic aerosols from the  
540 oxidation of  $\alpha$ -pinene and real plant emissions, *Atmos. Chem. Phys.*, 11(4), 1367–1378, doi:10.5194/acp-11-  
541 1367-2011, 2011.
- 542 Henry, K. M., Lohaus, T. and Donahue, N. M.: Organic Aerosol Yields from  $\alpha$ -Pinene Oxidation: Bridging  
543 the Gap between First-Generation Yields and Aging Chemistry, *Environ. Sci. Technol.*, 46(22), 12347–  
544 12354, doi:10.1021/es302060y, 2012.

- 545 Jacobson, M. Z.: Numerical techniques to solve condensational and dissolutional growth equations when  
546 growth is coupled to reversible reactions, *Aerosol Sci. Technol.*, 27(4), 491–498,  
547 doi:10.1080/02786829708965489, 1997.
- 548 Jenkin, M. E., Saunders, S. M. and Pilling, M. J.: The tropospheric degradation of volatile organic  
549 compounds: A protocol for mechanism development, *Atmos. Environ.*, 31(1), 81–104, doi:10.1016/S1352-  
550 2310(96)00105-7, 1997.
- 551 Jenkin, M. E., Young, J. C. and Rickard, A. R.: The MCM v3.3.1 degradation scheme for isoprene, *Atmos.*  
552 *Chem. Phys.*, 15(20), 11433–11459, doi:10.5194/acp-15-11433-2015, 2015.
- 553 Jenkin, M. E., Wyche, K. P., Evans, C. J., Carr, T., Monks, P. S., Alfarra, M. R., Barley, M. H., McFiggans,  
554 G. B., Young, J. C. and Rickard, A. R.: Development and chamber evaluation of the MCM v3.2 degradation  
555 scheme for  $\beta$ -caryophyllene, *Atmos. Chem. Phys.*, 12(11), 5275–5308, doi:10.5194/acp-12-5275-2012, 2012.
- 556 Jenkin, M. E., Valorso, R., Aumont, B. and Rickard, A. R.: Estimation of rate coefficients and branching ra-  
557 tios for reactions of organic peroxy radicals for use in automated mechanism construction, *Atmos. Chem.*  
558 *Phys. Discuss.*, (February), 1–46, doi:10.5194/acp-2019-44, 2019.
- 559 Jokinen, T., Berndt, T., Makkonen, R., Kerminen, V.-M., Junninen, H., Paasonen, P., Stratmann, F.,  
560 Herrmann, H., Guenther, A. B., Worsnop, D. R., Kulmala, M., Ehn, M. and Sipilä, M.: Production of  
561 extremely low volatile organic compounds from biogenic emissions: Measured yields and atmospheric  
562 implications, *Proc. Natl. Acad. Sci.*, 112(23), 7123–7128, doi:10.1073/pnas.1423977112, 2015.
- 563 Kanakidou, M., Seinfeld, J. H., Pandis, S. N., Barnes, I., Dentener, F. J., Facchini, M. C. and Dingenen, R.  
564 Van: Organic aerosol and global climate modelling: a review, , 1053–1123, 2005.
- 565 Kang, E. and Root, M. J.: Introducing the concept of Potential Aerosol Mass (PAM), *Atmos. Chem. Phys.*,  
566 (7), 5727–5744
- 567 Keywood, M. D., Varutbangkul, V., Bahreini, R., Flagan, R. C. and Seinfeld, J. H.: Secondary organic aerosol  
568 formation from the ozonolysis of cycloalkenes and related compounds, *Environ. Sci. Technol.*, 38(15), 4157–  
569 4164, doi:10.1021/es035363o, 2004.
- 570 Korhonen, H., Lehtinen, K. E. J. and Kulmala, M.: Atmospheric Chemistry and Physics Multicomponent  
571 aerosol dynamics model UHMA: model development and validation, *Atmos. Chem. Phys.*, 4, 757–771,  
572 doi:10.1002/erv.2305, 2004.
- 573 Kristensen, K., Cui, T., Zhang, H., Gold, A., Glasius, M. and Surratt, J. D.: Dimers in  $\alpha$ -pinene secondary  
574 organic aerosol: Effect of hydroxyl radical, ozone, relative humidity and aerosol acidity, *Atmos. Chem. Phys.*,  
575 14(8), 4201–4218, doi:10.5194/acp-14-4201-2014, 2014.
- 576 Kristensen, K., Jensen, L. N., Glasius, M. and Bilde, M.: The effect of sub-zero temperature on the formation  
577 and composition of secondary organic aerosol from ozonolysis of alpha-pinene, *Environ. Sci. Process.*  
578 *Impacts*, 19(10), 1220–1234, doi:10.1039/c7em00231a, 2017.
- 579 Kroll, J. H., Ng, N. L., Murphy, S. M., Flagan, R. C. and Seinfeld, J. H.: Secondary organic aerosol formation  
580 from isoprene photooxidation under high-NO<sub>x</sub> conditions, *Geophys. Res. Lett.*, 32(18), 1–4,  
581 doi:10.1029/2005GL023637, 2005.
- 582 Lambe, A. T., Onasch, T. B., Massoli, P., Croasdale, D. R., Wright, J. P., Ahern, A. T., Williams, L. R.,  
583 Worsnop, D. R., Brune, W. H. and Davidovits, P.: Laboratory studies of the chemical composition and cloud  
584 condensation nuclei (CCN) activity of secondary organic aerosol (SOA) and oxidized primary organic aerosol  
585 (OPOA), *Atmos. Chem. Phys.*, 11(17), 8913–8928, doi:10.5194/acp-11-8913-2011, 2011.



- 586 Lambe, A. T., Chhabra, P. S., Onasch, T. B., Brune, W. H., Hunter, J. F., Kroll, J. H., Cummings, M. J.,  
587 Brogan, J. F., Parmar, Y., Worsnop, D. R., Kolb, C. E. and Davidovits, P.: Effect of oxidant concentration,  
588 exposure time, and seed particles on secondary organic aerosol chemical composition and yield, *Atmos.*  
589 *Chem. Phys.*, 15(6), 3063–3075, doi:10.5194/acp-15-3063-2015, 2015.
- 590 Lee, A., Goldstein, A. H., Keywood, M. D., Gao, S., Varutbangkul, V., Bahreini, R., Ng, N. L., Flagan, R. C.  
591 and Seinfeld, J. H.: Gas-phase products and secondary aerosol yields from the ozonolysis of ten different  
592 terpenes, *J. Geophys. Res. Atmos.*, 111(7), 1–18, doi:10.1029/2005JD006437, 2006.
- 593 Liu, J., D'Ambro, E. L., Lee, B. H., Lopez-Hilfiker, F. D., Zaveri, R. A., Rivera-Rios, J. C., Keutsch, F. N.,  
594 Iyer, S., Kurten, T., Zhang, Z., Gold, A., Surratt, J. D., Shilling, J. E. and Thornton, J. A.: Efficient Isoprene  
595 Secondary Organic Aerosol Formation from a Non-IEPOX Pathway, *Environ. Sci. Technol.*, 50(18), 9872–  
596 9880, doi: 10.1021/acs.est.6b01872, 2016.
- 597 Miller, K. A., Siscovick, D. S., Sheppard, L., Shepherd, K., Sullivan, J. H., Anderson, G., L. and Kaufman J.  
598 D.: Long-Term Exposure to Air Pollution and Incidence of Cardiovascular Events in Women, *N. Engl. J.*  
599 *Med.*, 356(5), 447–458, doi:10.1002/anie.201206370, 2007.
- 600 Nannoolal, Y., Rarey, J. and Ramjugernath, D.: Estimation of pure component properties part 3. Estimation of  
601 the vapor pressure of non-electrolyte organic compounds via group contribution and group interactions, *Fluid*  
602 *Phase Equilib.*, 269(1–2), 117–133, doi: 10.1016/j.fluid.2008.04.020, 2008.
- 603 Nah, T., Sanchez, J., Boyd, C. M. and Ng, N. L.: Photochemical Aging of  $\alpha$ -pinene and  $\beta$ -pinene Secondary  
604 Organic Aerosol formed from Nitrate Radical Oxidation, *Environ. Sci. Technol.*, 50(1), 222–231,  
605 doi:10.1021/acs.est.5b04594, 2016.
- 606 Ng, N. L. and Chhabra, P. S.: Effect of NO<sub>x</sub> level on secondary organic aerosol (SOA) formation from the  
607 photooxidation of terpenes, *Atmos. Chem. Phys.*, (7), 5159–5174, doi: 10.1016/j.cub.2015.10.018, 2007.
- 608 Öström, E., Putian, Z., Schurgers, G., Mishurov, M., Kivekäs, N. and Lihavainen, H.: Modeling the role of  
609 highly oxidized multifunctional organic molecules for the growth of new particles over the boreal forest re-  
610 gion, , 8887–8901, 2017.
- 611 Pankow, J. F. and Asher, W. E.: SIMPOL.1: a simple group contribution method for predicting vapor  
612 pressures and enthalpies of vaporization of multifunctional organic compounds, *Rev. Mex. Ciencias Farm.*,  
613 (8), 2773–2796, doi:doi: 10.5194/acp-8-2773-2008, 2008.
- 614 Pathak, R., Donahue, N. M. and Pandis, S. N.: Ozonolysis of  $\beta$ -pinene: Temperature dependence of secondary  
615 organic aerosol mass fraction, *Environ. Sci. Technol.*, 42(14), 5081–5086, doi:10.1021/es070721z, 2008.
- 616 Pathak, R. K., Stanier, C. O., Donahue, N. M. and Pandis, S. N.: Ozonolysis of  $\alpha$ -pinene at atmospherically  
617 relevant concentrations: Temperature dependence of aerosol mass fractions (yields), *J. Geophys. Res. Atmos.*,  
618 112(3), 1–8, doi:10.1029/2006JD007436, 2007.
- 619 Presto, A. A., Huff Hartz, K. E. and Donahue, N. M.: Secondary organic aerosol production from terpene  
620 ozonolysis. 2. Effect of NO<sub>x</sub> concentration, *Environ. Sci. Technol.*, 39(18), 7046–7054,  
621 doi:10.1021/es050400s, 2005.
- 622 Qi, X., Ding, A., Roldin, P., Xu, Z., Zhou, P., Sarnela, N., Nie, W., Huang, X., Rusanen, A., Ehn, M., Rissa-  
623 nen, M. P., Petäjä, T., Kulmala, M. and Boy, M.: Modelling studies of HOMs and their contributions to new  
624 particle formation and growth: Comparison of boreal forest in Finland and a polluted environment in China,  
625 *Atmos. Chem. Phys.*, 18(16), 11779–11791, doi:10.5194/acp-18-11779-2018, 2018.

- 626 Quéléver, L. L. J., Kristensen, K., Jensen, L., Rosati, B., Teiwes, R., Daellenbach, K. R., Peräkylä, O., Roldin,  
627 P., Pedersen, H. B., Glasius, M., Bilde, M., and Ehn, M.: Effect of temperature on the formation of Highly-  
628 oxygenated Organic Molecules (HOM) from alpha-pinene ozonolysis, *Atmos. Chem. Phys. Discuss.*,  
629 <https://doi.org/10.5194/acp-2018-1276>, in review, 2018.
- 630 Roldin P., Ehn, M, Kurtén, T., Olenius, T., Rissanen, M.P., Sarnela, N., Elm, J., Rantala, P., Hao, L.,  
631 Hyttinen, N., Heikkinen, L., Worsnop, D. R., Pichelstorfer, L., Xavier, C., Clusius, P., Öström, E., Petäjä, T.,  
632 Kulmala, M., Vehkamäki, H., Virtanen, A., Riipinen, I., and Boy, M., The role of highly oxygenated organic  
633 molecules in the Boreal aerosol-cloud-climate system, *Nature Communications*, under review 2019.
- 634 Rosenfeld, D., Andreae, M. O., Asmi, A., Chin M., De Leeuw, G., Donovan, D. P., Kahn, R, Kinne, S.,  
635 Kivekäs, N., Kulmala, M., Lau W., Schmidt K, S., Suni T., Wagner T., Wild, M., and Quaas J., Global obser-  
636 vations of aerosol-cloud-precipitation-climate interactions, *Rev. Geophys.*, 52, 750–808,  
637 [doi:10.1002/2013RG000441](https://doi.org/10.1002/2013RG000441).
- 638 Saathoff, H. and Naumann, K.-H.: Temperature dependence of yields of secondary organic aerosols from the  
639 ozonolysis of  $\alpha$ -pinene and limonene, *Atmos. Chem. Phys.*, (March), 4–15, [doi:10.5194/acp-9-1551-2009](https://doi.org/10.5194/acp-9-1551-2009),  
640 2009.
- 641 Sarrafzadeh, M., Wildt, J., Pullinen, I., Springer, M., Kleist, E., Tillmann, R., Schmitt, S. H., Wu, C., Mentel,  
642 T. F., Zhao, D., Hastie, D. R. and Kiendler-Scharr, A.: Impact of NO<sub>x</sub> and OH on secondary organic aerosol  
643 formation from  $\beta$ -pinene photooxidation, *Atmos. Chem. Phys.*, 16(17), 11237–11248, [doi:10.5194/acp-16-](https://doi.org/10.5194/acp-16-11237-2016)  
644 [11237-2016](https://doi.org/10.5194/acp-16-11237-2016), 2016.
- 645 Saunders, S. M., Jenkin, M. E., Derwent, R. G. and Pilling, M. J.: Protocol for the development of the Master  
646 Chemical Mechanism, MCM v3 (Part A): Tropospheric degradation of non-aromatic volatile organic  
647 compounds, *Atmos. Chem. Phys.*, 3(1), 161–180, [doi:10.5194/acp-3-161-2003](https://doi.org/10.5194/acp-3-161-2003), 2003.
- 648 Schmale, J., Henning, S., Henzing, B., Keskinen, H., Sellegri, K., Ovadnevaite, J., Bougiatioti, A., Kalivitis,  
649 N., Stavroulas, I., Jefferson, A., Park, M., Schlag, P., Kristensson, A., Iwamoto, Y., Pringle, K., Reddington,  
650 C., Aalto, P., Äijälä, M., Baltensperger, U., Bialek, J., Birmili, W., Bukowiecki, N., Ehn, M., Fjærraa, A. M.,  
651 Fiebig, M., Frank, G., Fröhlich, R., Frumau, A., Furuya, M., Hammer, E., Heikkinen, L., Herrmann, E.,  
652 Holzinger, R., Hyono, H., Kanakidou, M., Kiendler-Scharr, A., Kinouchi, K., Kos, G., Kulmala, M.,  
653 Mihalopoulos, N., Motos, G., Nenes, A., O’Dowd, C., Paramonov, M., Petäjä, T., Picard, D., Poulain, L.,  
654 Prévôt, A. S. H., Slowik, J., Sonntag, A., Swietlicki, E., Svenningsson, B., Tsurumaru, H., Wiedensohler, A.,  
655 Wittbom, C., Ogren, J. A., Matsuki, A., Yum, S. S., Myhre, C. L., Carslaw, K., Stratmann, F. and Gysel, M.:  
656 Corrigendum: Collocated observations of cloud condensation nuclei, particle size distributions, and chemical  
657 composition, *Sci. data*, 5, 180094, [doi:10.1038/sdata.2018.94](https://doi.org/10.1038/sdata.2018.94), 2018.
- 658 Shilling, J. E.: Particle mass yield in secondary organic aerosol formed by the dark ozonolysis of  $\alpha$ -pinene,  
659 *Atmos. Chem. Phys.*, 8(1992), 2073–2088, 2008.
- 660 Stirnweis, L., Marcolli, C., Dommen, J., Barmet, P., Frege, C., Platt, S. M., Bruns, E. A., Krapf, M., Slowik,  
661 J. G., Wolf, R., Prévôt, A. S. H., Baltensperger, U. and El-Haddad, I.: Assessing the influence of NO<sub>x</sub> con-  
662 centrations and relative humidity on secondary organic aerosol yields from  $\alpha$ -pinene photo-oxidation through  
663 smog chamber experiments and modelling calculations, *Atmos. Chem. Phys.*, 17(8), 5035–5061, [doi:10.5194/](https://doi.org/10.5194/acp-17-5035-2017)  
664 [acp-17-5035-2017](https://doi.org/10.5194/acp-17-5035-2017), 2017.
- 665 Tasoglou, A. and Pandis, S. N.: Formation and chemical aging of secondary organic aerosol during the  $\beta$ -  
666 caryophyllene oxidation, *Atmos. Chem. Phys.*, 15(11), 6035–6046, [doi:10.5194/acp-15-6035-2015](https://doi.org/10.5194/acp-15-6035-2015), 2015.
- 667 Topping, D.: UManSysProp v1.0: an online and open-source facility for molecular property prediction and  
668 atmospheric aerosol calculations, , 899–914, [doi:10.5281/zenodo.45143](https://doi.org/10.5281/zenodo.45143), 2016.

- 669 Waring, M. S.: Secondary organic aerosol formation by limonene ozonolysis: Parameterizing multi-  
670 generational chemistry in ozone- and residence time-limited indoor environments, *Atmos. Environ.*, 144, 79–  
671 86, doi:<https://doi.org/10.1016/j.atmosenv.2016.08.051>, 2016.
- 672 Zhao, D., Schmitt, S. H., Wang, M., Acir, I. H., Tillmann, R., Tan, Z., Novelli, A., Fuchs, H., Pullinen, I.,  
673 Wegener, R., Rohrer, F., Wildt, J., Kiendler-Scharr, A., Wahner, A. and Mentel, T. F.: Effects of NO<sub>x</sub> and  
674 SO<sub>2</sub> on the secondary organic aerosol formation from photooxidation of  $\alpha$ -pinene and limonene, *Atmos.*  
675 *Chem. Phys.*, 18(3), 1611–1628, doi:10.5194/acp-18-1611-2018, 2018.
- 676 Zhao, D. F., Kaminski, M., Schlag, P., Fuchs, H., Acir, I. H., Bohn, B., Häseler, R., Kiendler-Scharr, A.,  
677 Rohrer, F., Tillmann, R., Wang, M. J., Wegener, R., Wildt, J., Wahner, A. and Mentel, T. F.: Secondary  
678 organic aerosol formation from hydroxyl radical oxidation and ozonolysis of monoterpenes, *Atmos. Chem.*  
679 *Phys.*, 15(2), 991–1012, doi:10.5194/acp-15-991-2015, 2015.
